# Supplementary material for: Endophytic Life Strategies Decoded by Genome and Transcriptome Analyses of the Mutualistic Root Symbiont Piriformospora indica
Source: PLoS Pathog. 2011 Oct 13;7(10):e1002290. doi: 10.1371/journal.ppat.1002290 (PMC3192844; doi:10.1371/journal.ppat.1002290)
Supplement: Table S2 — Genome features of P. indica and related fungi. (XLS) [file ppat.1002290.s018.xls]

## Sheet: Sheet1
Table S2: Genome feature of P. indica and related fungi
	P. indica	L. bicolor	C. cinerea	U. maydis
Genome size (bp)	24979981	64877444	36336803	19702792
GC-content (%)	50.68	46.97	51.64	54.03
Protein coding genes	11769	22152	13525	6786
Gene density (Number of genes per Mb)	471.137	341.444	372.212	344.418
Average distance between genes (bp)	530 ± 608 (336)	1524 ± 2518 (702)	980 ± 1583 (571)	1059 ± 1233 (727)
Percent coding (%)	15446826 (61.8)	23187806 (35.7)	18569643 (51.1)	12027273 (62.6)
GC-content coding (%)	52.3	50.25	53.98	56.27
Average mRNA length (bp)	1313 ± 1037 (1074)	1135 ± 932 (891)	1386 ± 1059 (1128)	1773 ± 1328 (1461)
Average gene length (bp)	1550 ± 1173 (1282)	1534 ± 1577 (1200)	1718 ± 1229 (1438)	1837 ± 1313 (1507)
Exons	60686	110627	75300	9782
Average exon length (bp)	255 ± 335 (146)	210 ± 273 (129)	247 ± 329 (144)	1230 ± 1315 (859)
Exons/gene	5.16 ± 4.03	5.42 ± 4.56	5.62 ± 4.25	1.44 ± 0.92
Introns	48918	90196	61900	2996
Average intron length (bp)	57.4 ± 55.6	72.1 ± 61.5	90.7 ± 455.2	146 ± 157
tRNA genes	58	330	289	111
Secreted proteins (SP)	867	992	1102	514
Small secreted proteins < 300aa (% of SP)	386 (45%)	519 (52%)	561 (51%)	240 (47%)
Unique Gene models (eVal < 10‑3)	3134 (27%)	4869 (22%)	1943 (14%)	869 (13%)
Unique SSP < 300aa	197	183	147	161
Functional domains (Pfam)	2785	2830	2826	2780
Protein families (Tribe-MCL)	4458	5507	5198	3619
Number of proteins per protein family	2.26	3.35	2.25	1.58
Percentage of proteins in protein families	85.5383	83.3965	86.6248	84.3354
