# Supplementary material for: Endophytic Life Strategies Decoded by Genome and Transcriptome Analyses of the Mutualistic Root Symbiont Piriformospora indica
Source: PLoS Pathog. 2011 Oct 13;7(10):e1002290. doi: 10.1371/journal.ppat.1002290 (PMC3192844; doi:10.1371/journal.ppat.1002290)
Supplement: Table S4 — tRNA genes along with their respective anticodons present in P. indica. (XLS) [file ppat.1002290.s020.xls]

## Sheet: Sheet1
Table S4: tRNA genes along with their respective anticodons present in P. indica
Amino Acid	Anticodons
Alanine: 3	AGC: 1	GGC: 0	CGC: 1	TGC: 1
Arginine: 5	ACG: 1	GCG: 0	CCG: 1	TCG: 1	CCT: 1	TCT: 1
Asparagine: 1	ATT: 0	GTT: 1
Aspartate: 2	ATC: 0	GTC: 2
Cysteine: 1	ACA: 0	GCA: 1
Glutamate: 4			CTC: 2	TTC: 2
Glutamine: 3			CTG: 1	TTG: 2
Glycine: 4	ACC: 0	GCC: 2	CCC: 1	TCC: 1
Histidine: 1	ATG: 0	GTG: 1
Isoleucine: 2	AAT: 1	GAT: 0		TAT: 1
Leucine: 5	AAG: 1	GAG: 0	CAG: 1	TAG: 1	CAA: 1	TAA: 1
Lysine: 2			CTT: 1	TTT: 1
Methionine: 2			CAT: 2
Phenylalanine: 1	AAA: 0	GAA: 1
Proline: 3	AGG: 1	GGG: 0	CGG: 1	TGG: 1
Selenocysteine: 0				TCA: 0
Serine: 4	AGA: 1	GGA: 0	CGA: 1	TGA: 0	ACT: 1	GCT: 1
Supressor: 0			CTA: 0	TTA: 0
Threonine: 4	AGT: 1	GGT: 0	CGT: 1	TGT: 2
Tryptophan: 1			CCA: 1
Tyrosin: 1	ATA: 0	GTA: 1
Valine: 3	AAC: 1	GAC: 0	CAC: 1	TAC: 1
Unknown istoype: 2
Pseudo-tRNAs: 4
Transfer RNAs were predicted using tRNAscan-SE (Lowe and Eddy, 1997) with standard settings.
