# Supplementary material for: Endophytic Life Strategies Decoded by Genome and Transcriptome Analyses of the Mutualistic Root Symbiont Piriformospora indica
Source: PLoS Pathog. 2011 Oct 13;7(10):e1002290. doi: 10.1371/journal.ppat.1002290 (PMC3192844; doi:10.1371/journal.ppat.1002290)
Supplement: Table S11 — Enrichment analysis performed using GOEAST. (XLS) [file ppat.1002290.s027.xls]

## Sheet: Sheet1
Table S11: Enrichment analysis performed using GOEAST
GOID	Ontology	Term	q1	m2	p3	t4	k5	log_odds_ratio6	P. indica probes
Induced genes in P. indica colonized living vs dead roots (symbiosis)
GO:0005739	cellular_component	mitochondrion	63	399	5.92656e-11	6866	426/906	1.34758	PIIN_06309 // PIIN_02436 // PIIN_09004 // PIIN_00110 // PIIN_08993 // PIIN_05435 // PIIN_06475 // PIIN_02330 // PIIN_04631 // PIIN_06540 // PIIN_04300 // PIIN_06468 // PIIN_08508 // PIIN_02994 // PIIN_08185 // PIIN_03494 // PIIN_05423 // PIIN_10854 // PIIN_07613 // PIIN_00040 // PIIN_05033 // PIIN_00891 // PIIN_03164 // PIIN_08737 // PIIN_02535 // PIIN_05647 // PIIN_07683 // PIIN_09990 // PIIN_05…
GO:0005215	molecular_function	transporter activity	56	413	5.09275e-07	6866	426/906	1.1279	PIIN_09697 // PIIN_01003 // PIIN_02436 // PIIN_04307 // PIIN_06359 // PIIN_02020 // PIIN_04631 // PIIN_06540 // PIIN_08185 // PIIN_00040 // PIIN_00866 // PIIN_01593 // PIIN_04341 // PIIN_07856 // PIIN_05033 // PIIN_04343 // PIIN_06028 // PIIN_08737 // PIIN_02521 // PIIN_07655 // PIIN_10069 // PIIN_09797 // PIIN_02927 // PIIN_06392 // PIIN_00989 // PIIN_09391 // PIIN_03036 // PIIN_06175 // PIIN_09…
GO:0015075	molecular_function	ion transmembrane transporter activity	36	231	6.87993e-06	6866	426/906	1.32872	PIIN_01003 // PIIN_02436 // PIIN_06359 // PIIN_02020 // PIIN_06540 // PIIN_08185 // PIIN_00040 // PIIN_00866 // PIIN_04341 // PIIN_07856 // PIIN_04343 // PIIN_06028 // PIIN_08737 // PIIN_02521 // PIIN_07655 // PIIN_10069 // PIIN_09797 // PIIN_06392 // PIIN_00989 // PIIN_09391 // PIIN_06175 // PIIN_09801 // PIIN_05089 // PIIN_03914 // PIIN_04428 // PIIN_02643 // PIIN_00937 // PIIN_08601 // PIIN_02…
GO:0006526	biological_process	arginine biosynthetic process	5	9	0.000391653	6866	426/906	3.16255	PIIN_02330 // PIIN_08602 // PIIN_02560 // PIIN_07432 // PIIN_05244
GO:0047526	molecular_function	2'-hydroxyisoflavone reductase activity	4	6	0.000493034	6866	426/906	3.42558	PIIN_07122 // PIIN_03757 // PIIN_11121 // PIIN_10453
GO:0015238	molecular_function	drug transmembrane transporter activity	10	41	0.00235344	6866	426/906	1.97492	PIIN_06359 // PIIN_02020 // PIIN_04341 // PIIN_04343 // PIIN_06028 // PIIN_07655 // PIIN_10069 // PIIN_09797 // PIIN_09801 // PIIN_06065
GO:0016679	molecular_function	oxidoreductase activity, acting on diphenols and related substances as donors	4	8	0.00359877	6866	426/906	3.01054	PIIN_04487 // PIIN_08185 // PIIN_03653 // PIIN_07856
GO:0015850	biological_process	organic alcohol transport	9	36	0.00372243	6866	426/906	2.01054	PIIN_06359 // PIIN_02020 // PIIN_04341 // PIIN_04343 // PIIN_06028 // PIIN_07655 // PIIN_10069 // PIIN_09797 // PIIN_09801
GO:0006808	biological_process	regulation of nitrogen utilization	6	20	0.0100973	6866	426/906	2.27358	PIIN_07122 // PIIN_03757 // PIIN_11121 // PIIN_10453 // PIIN_02868 // PIIN_09640
GO:0033903	molecular_function	endo-1,3(4)-beta-glucanase activity	4	10	0.0133582	6866	426/906	2.68862	PIIN_04400 // PIIN_09759 // PIIN_09232 // PIIN_07048
GO:0031497	biological_process	chromatin assembly	8	36	0.0185858	6866	426/906	1.84062	PIIN_04354 // PIIN_03526 // PIIN_09519 // PIIN_04314 // PIIN_09802 // PIIN_01126 // PIIN_08912 // PIIN_03169
GO:0009084	biological_process	glutamine family amino acid biosynthetic process	5	17	0.0260189	6866	426/906	2.24501	PIIN_02330 // PIIN_08602 // PIIN_02560 // PIIN_07432 // PIIN_05244
GO:0016491	molecular_function	oxidoreductase activity	70	783	0.0334729	6866	426/906	0.526959	PIIN_07038 // PIIN_07451 // PIIN_09428 // PIIN_07441 // PIIN_02105 // PIIN_02950 // PIIN_06089 // PIIN_07291 // PIIN_05404 // PIIN_08032 // PIIN_04487 // PIIN_08185 // PIIN_08359 // PIIN_03889 // PIIN_07374 // PIIN_10369 // PIIN_04088 // PIIN_10348 // PIIN_07122 // PIIN_03757 // PIIN_11085 // PIIN_03603 // PIIN_03653 // PIIN_02477 // PIIN_06768 // PIIN_07856 // PIIN_04810 // PIIN_08737 // PIIN_02…
GO:0030447	biological_process	filamentous growth	5	18	0.0352881	6866	426/906	2.16255	PIIN_00702 // PIIN_10695 // PIIN_06175 // PIIN_01887 // PIIN_07782
GO:0015980	biological_process	energy derivation by oxidation of organic compounds	10	60	0.0609441	6866	426/906	1.42558	PIIN_09004 // PIIN_08032 // PIIN_08185 // PIIN_07683 // PIIN_05089 // PIIN_00739 // PIIN_07691 // PIIN_07905 // PIIN_04117 // PIIN_00314
GO:0051213	molecular_function	dioxygenase activity	6	29	0.0932506	6866	426/906	1.73753	PIIN_07451 // PIIN_07374 // PIIN_01904 // PIIN_02079 // PIIN_09763 // PIIN_01807
GO:0050896	biological_process	response to stimulus	55	612	0.0985083	6866	426/906	0.534516	PIIN_01012 // PIIN_07540 // PIIN_04303 // PIIN_01758 // PIIN_06359 // PIIN_02020 // PIIN_09577 // PIIN_09559 // PIIN_02994 // PIIN_04314 // PIIN_11284 // PIIN_09157 // PIIN_10166 // PIIN_10142 // PIIN_04341 // PIIN_09802 // PIIN_01126 // PIIN_08912 // PIIN_04343 // PIIN_06028 // PIIN_07655 // PIIN_10069 // PIIN_09797 // PIIN_05485 // PIIN_07017 // PIIN_02535 // PIIN_05647 // PIIN_02920 // PIIN_10…
Induced genes in P. indica colonized dead vs living roots (saprotrophy)
GO:0008422	molecular_function	beta-glucosidase activity	11	32	3.65729e-08	6866	228/375	3.3718	PIIN_09211 // PIIN_07416 // PIIN_10286 // PIIN_03683 // PIIN_00485 // PIIN_00392 // PIIN_01553 // PIIN_02711 // PIIN_06333 // PIIN_01472 // PIIN_03577
GO:0005975	biological_process	carbohydrate metabolic process	44	514	1.93136e-07	6866	228/375	1.36617	PIIN_09211 // PIIN_07416 // PIIN_08205 // PIIN_00917 // PIIN_07753 // PIIN_01141 // PIIN_06679 // PIIN_06764 // PIIN_10157 // PIIN_08849 // PIIN_03994 // PIIN_08310 // PIIN_07895 // PIIN_02595 // PIIN_00455 // PIIN_02169 // PIIN_03612 // PIIN_03993 // PIIN_03992 // PIIN_05886 // PIIN_08751 // PIIN_00353 // PIIN_10600 // PIIN_00485 // PIIN_00392 // PIIN_01338 // PIIN_00146 // PIIN_01553 // PIIN_01…
GO:0003824	molecular_function	catalytic activity	174	4162	2.10735e-05	6866	228/375	0.332246	PIIN_02742 // PIIN_09211 // PIIN_09572 // PIIN_07416 // PIIN_05059 // PIIN_08205 // PIIN_10495 // PIIN_04921 // PIIN_00413 // PIIN_00917 // PIIN_01377 // PIIN_02320 // PIIN_02067 // PIIN_07405 // PIIN_10086 // PIIN_06090 // PIIN_06777 // PIIN_07753 // PIIN_05869 // PIIN_08953 // PIIN_01141 // PIIN_09871 // PIIN_05894 // PIIN_02277 // PIIN_06679 // PIIN_02587 // PIIN_01731 // PIIN_06764 // PIIN_09…
GO:0008643	biological_process	carbohydrate transport	9	37	3.53577e-05	6866	228/375	2.87284	PIIN_00334 // PIIN_07404 // PIIN_01298 // PIIN_03367 // PIIN_03368 // PIIN_05137 // PIIN_03369 // PIIN_04361 // PIIN_02129
GO:0016491	molecular_function	oxidoreductase activity	49	783	0.000432011	6866	228/375	0.914205	PIIN_05059 // PIIN_07405 // PIIN_06090 // PIIN_05869 // PIIN_08953 // PIIN_02277 // PIIN_02587 // PIIN_01731 // PIIN_09143 // PIIN_01762 // PIIN_09752 // PIIN_03999 // PIIN_10286 // PIIN_02595 // PIIN_00312 // PIIN_03612 // PIIN_01308 // PIIN_05236 // PIIN_03842 // PIIN_08332 // PIIN_01979 // PIIN_03683 // PIIN_08554 // PIIN_05541 // PIIN_03955 // PIIN_10165 // PIIN_08616 // PIIN_09569 // PIIN_09…
GO:0009251	biological_process	glucan catabolic process	7	32	0.00100349	6866	228/375	2.71972	PIIN_08310 // PIIN_03992 // PIIN_08751 // PIIN_00353 // PIIN_10600 // PIIN_07522 // PIIN_03577
GO:0030245	biological_process	cellulose catabolic process	7	32	0.00100349	6866	228/375	2.71972	PIIN_08310 // PIIN_03992 // PIIN_08751 // PIIN_00353 // PIIN_10600 // PIIN_07522 // PIIN_03577
GO:0016052	biological_process	carbohydrate catabolic process	16	152	0.00139824	6866	228/375	1.66444	PIIN_06679 // PIIN_10157 // PIIN_03994 // PIIN_08310 // PIIN_00455 // PIIN_03612 // PIIN_03993 // PIIN_03992 // PIIN_05886 // PIIN_08751 // PIIN_00353 // PIIN_10600 // PIIN_07522 // PIIN_09982 // PIIN_03577 // PIIN_07822
GO:0030246	molecular_function	carbohydrate binding	18	217	0.0124738	6866	228/375	1.32074	PIIN_07416 // PIIN_06090 // PIIN_01141 // PIIN_06679 // PIIN_10157 // PIIN_08310 // PIIN_07895 // PIIN_03993 // PIIN_03992 // PIIN_05886 // PIIN_08751 // PIIN_00353 // PIIN_10600 // PIIN_10164 // PIIN_03736 // PIIN_07522 // PIIN_03975 // PIIN_09982
GO:0031176	molecular_function	endo-1,4-beta-xylanase activity	6	35	0.015175	6866	228/375	2.36804	PIIN_03994 // PIIN_03993 // PIIN_03992 // PIIN_05886 // PIIN_09982 // PIIN_07822
GO:0004312	molecular_function	fatty acid synthase activity	3	11	0.037147	6866	228/375	3.0379	PIIN_05869 // PIIN_05541 // PIIN_08467
GO:0016787	molecular_function	hydrolase activity	90	2026	0.0424541	6866	228/375	0.419799	PIIN_09211 // PIIN_07416 // PIIN_04921 // PIIN_00413 // PIIN_00917 // PIIN_01377 // PIIN_02067 // PIIN_10086 // PIIN_07753 // PIIN_01141 // PIIN_09871 // PIIN_06679 // PIIN_06764 // PIIN_09952 // PIIN_02303 // PIIN_04931 // PIIN_10157 // PIIN_08849 // PIIN_03994 // PIIN_08310 // PIIN_07895 // PIIN_10651 // PIIN_10798 // PIIN_03785 // PIIN_10286 // PIIN_08472 // PIIN_11603 // PIIN_00455 // PIIN_02…
GO:0045493	biological_process	xylan catabolic process	6	47	0.0715734	6866	228/375	1.94274	PIIN_03994 // PIIN_03993 // PIIN_03992 // PIIN_05886 // PIIN_09982 // PIIN_07822
GO:0004091	molecular_function	carboxylesterase activity	8	83	0.0998864	6866	228/375	1.53732	PIIN_00413 // PIIN_07753 // PIIN_02169 // PIIN_06172 // PIIN_03736 // PIIN_07522 // PIIN_07749 // PIIN_07750
1 Count of probes associated with the listed GOID (directly or indirectly) in the dataset.
2 Count of probes associated with the listed GOID (directly or indirectly) on the microarray platform.
3 P-value of the significance for the enrichment in the dataset of the listed GOID.
4 Total number of probes on the microarray.
5 Total number of probes in the dataset with a GOID.
6 Logarithm (base 2) of the odds ratio of the enrichment of the GOID. The larger this number is, the stronger the enrichment the GOID among probes in your dataset.
GOEAST: http://omicslab.genetics.ac.cn/GOEAST/index.php
