# Supplementary material for: Endophytic Life Strategies Decoded by Genome and Transcriptome Analyses of the Mutualistic Root Symbiont Piriformospora indica
Source: PLoS Pathog. 2011 Oct 13;7(10):e1002290. doi: 10.1371/journal.ppat.1002290 (PMC3192844; doi:10.1371/journal.ppat.1002290)
Supplement: Table S17 — EMBL accession numbers. (XLSX) [file ppat.1002290.s033.xlsx]

## Sheet: Sheet1
Table S17: EMBL accession numbers
ID	AC		State	Version
FQ857196	FQ857196	_PIRI_CONTIG_0001;	Finished	1
FQ857197	FQ857197	_PIRI_CONTIG_0002;	Finished	1
FQ857198	FQ857198	_PIRI_CONTIG_0003;	Finished	1
FQ857199	FQ857199	_PIRI_CONTIG_0004;	Finished	1
FQ857200	FQ857200	_PIRI_CONTIG_0005;	Finished	1
FQ859080	FQ859080	_PIRI_CONTIG_0006;	Finished	1
FQ857202	FQ857202	_PIRI_CONTIG_0007;	Finished	1
FQ859082	FQ859082	_PIRI_CONTIG_0008;	Finished	1
FQ857204	FQ857204	_PIRI_CONTIG_0009;	Finished	1
FQ857205	FQ857205	_PIRI_CONTIG_0010;	Finished	1
FQ857206	FQ857206	_PIRI_CONTIG_0011;	Finished	1
FQ857207	FQ857207	_PIRI_CONTIG_0012;	Finished	1
FQ857208	FQ857208	_PIRI_CONTIG_0013;	Finished	1
FQ857209	FQ857209	_PIRI_CONTIG_0014;	Finished	1
FQ857210	FQ857210	_PIRI_CONTIG_0015;	Finished	1
FQ857211	FQ857211	_PIRI_CONTIG_0016;	Finished	1
FQ857212	FQ857212	_PIRI_CONTIG_0017;	Finished	1
FQ857213	FQ857213	_PIRI_CONTIG_0018;	Finished	1
FQ857214	FQ857214	_PIRI_CONTIG_0019;	Finished	1
FQ857215	FQ857215	_PIRI_CONTIG_0020;	Finished	1
FQ857216	FQ857216	_PIRI_CONTIG_0021;	Finished	1
FQ857217	FQ857217	_PIRI_CONTIG_0022;	Finished	1
FQ857218	FQ857218	_PIRI_CONTIG_0023;	Finished	1
FQ859087	FQ859087	_PIRI_CONTIG_0024;	Finished	1
FQ857219	FQ857219	_PIRI_CONTIG_0025;	Finished	1
FQ857220	FQ857220	_PIRI_CONTIG_0026;	Finished	1
FQ857221	FQ857221	_PIRI_CONTIG_0027;	Finished	1
FQ857222	FQ857222	_PIRI_CONTIG_0028;	Finished	1
FQ857223	FQ857223	_PIRI_CONTIG_0029;	Finished	1
FQ857224	FQ857224	_PIRI_CONTIG_0030;	Finished	1
FQ857225	FQ857225	_PIRI_CONTIG_0031;	Finished	1
FQ857226	FQ857226	_PIRI_CONTIG_0032;	Finished	1
FQ857227	FQ857227	_PIRI_CONTIG_0033;	Finished	1
FQ857228	FQ857228	_PIRI_CONTIG_0034;	Finished	1
FQ857229	FQ857229	_PIRI_CONTIG_0035;	Finished	1
FQ857230	FQ857230	_PIRI_CONTIG_0036;	Finished	1
FQ857231	FQ857231	_PIRI_CONTIG_0037;	Finished	1
FQ857232	FQ857232	_PIRI_CONTIG_0038;	Finished	1
FQ857233	FQ857233	_PIRI_CONTIG_0039;	Finished	1
FQ857234	FQ857234	_PIRI_CONTIG_0040;	Finished	1
FQ857235	FQ857235	_PIRI_CONTIG_0041;	Finished	1
FQ857236	FQ857236	_PIRI_CONTIG_0042;	Finished	1
FQ857237	FQ857237	_PIRI_CONTIG_0043;	Finished	1
FQ857238	FQ857238	_PIRI_CONTIG_0044;	Finished	1
FQ857239	FQ857239	_PIRI_CONTIG_0045;	Finished	1
FQ857240	FQ857240	_PIRI_CONTIG_0046;	Finished	1
FQ857241	FQ857241	_PIRI_CONTIG_0047;	Finished	1
FQ857242	FQ857242	_PIRI_CONTIG_0048;	Finished	1
FQ857243	FQ857243	_PIRI_CONTIG_0049;	Finished	1
FQ859073	FQ859073	_PIRI_CONTIG_0050;	Finished	1
FQ857244	FQ857244	_PIRI_CONTIG_0051;	Finished	1
FQ857245	FQ857245	_PIRI_CONTIG_0052;	Finished	1
FQ857246	FQ857246	_PIRI_CONTIG_0053;	Finished	1
FQ857247	FQ857247	_PIRI_CONTIG_0054;	Finished	1
FQ857248	FQ857248	_PIRI_CONTIG_0055;	Finished	1
FQ857249	FQ857249	_PIRI_CONTIG_0056;	Finished	1
FQ857250	FQ857250	_PIRI_CONTIG_0057;	Finished	1
FQ857251	FQ857251	_PIRI_CONTIG_0058;	Finished	1
FQ857252	FQ857252	_PIRI_CONTIG_0059;	Finished	1
FQ857253	FQ857253	_PIRI_CONTIG_0060;	Finished	1
FQ859077	FQ859077	_PIRI_CONTIG_0061;	Finished	1
FQ857254	FQ857254	_PIRI_CONTIG_0062;	Finished	1
FQ857255	FQ857255	_PIRI_CONTIG_0063;	Finished	1
FQ857256	FQ857256	_PIRI_CONTIG_0064;	Finished	1
FQ857257	FQ857257	_PIRI_CONTIG_0065;	Finished	1
FQ857258	FQ857258	_PIRI_CONTIG_0066;	Finished	1
FQ857259	FQ857259	_PIRI_CONTIG_0067;	Finished	1
FQ857260	FQ857260	_PIRI_CONTIG_0068;	Finished	1
FQ857261	FQ857261	_PIRI_CONTIG_0069;	Finished	1
FQ857262	FQ857262	_PIRI_CONTIG_0070;	Finished	1
FQ857263	FQ857263	_PIRI_CONTIG_0071;	Finished	1
FQ857264	FQ857264	_PIRI_CONTIG_0072;	Finished	1
FQ857265	FQ857265	_PIRI_CONTIG_0073;	Finished	1
FQ857266	FQ857266	_PIRI_CONTIG_0074;	Finished	1
FQ857267	FQ857267	_PIRI_CONTIG_0075;	Finished	1
FQ857268	FQ857268	_PIRI_CONTIG_0076;	Finished	1
FQ857269	FQ857269	_PIRI_CONTIG_0077;	Finished	1
FQ857270	FQ857270	_PIRI_CONTIG_0078;	Finished	1
FQ857271	FQ857271	_PIRI_CONTIG_0079;	Finished	1
FQ857272	FQ857272	_PIRI_CONTIG_0080;	Finished	1
FQ857273	FQ857273	_PIRI_CONTIG_0081;	Finished	1
FQ857274	FQ857274	_PIRI_CONTIG_0082;	Finished	1
FQ857275	FQ857275	_PIRI_CONTIG_0083;	Finished	1
FQ857276	FQ857276	_PIRI_CONTIG_0084;	Finished	1
FQ857277	FQ857277	_PIRI_CONTIG_0085;	Finished	1
FQ857278	FQ857278	_PIRI_CONTIG_0086;	Finished	1
FQ857279	FQ857279	_PIRI_CONTIG_0087;	Finished	1
FQ857280	FQ857280	_PIRI_CONTIG_0088;	Finished	1
FQ857281	FQ857281	_PIRI_CONTIG_0089;	Finished	1
FQ857282	FQ857282	_PIRI_CONTIG_0090;	Finished	1
FQ857283	FQ857283	_PIRI_CONTIG_0091;	Finished	1
FQ857284	FQ857284	_PIRI_CONTIG_0092;	Finished	1
FQ857285	FQ857285	_PIRI_CONTIG_0093;	Finished	1
FQ857286	FQ857286	_PIRI_CONTIG_0094;	Finished	1
FQ857287	FQ857287	_PIRI_CONTIG_0095;	Finished	1
FQ857288	FQ857288	_PIRI_CONTIG_0096;	Finished	1
FQ857289	FQ857289	_PIRI_CONTIG_0097;	Finished	1
FQ857290	FQ857290	_PIRI_CONTIG_0098;	Finished	1
FQ857291	FQ857291	_PIRI_CONTIG_0099;	Finished	1
FQ857292	FQ857292	_PIRI_CONTIG_0100;	Finished	1
FQ857293	FQ857293	_PIRI_CONTIG_0101;	Finished	1
FQ857294	FQ857294	_PIRI_CONTIG_0102;	Finished	1
FQ857295	FQ857295	_PIRI_CONTIG_0103;	Finished	1
FQ857296	FQ857296	_PIRI_CONTIG_0104;	Finished	1
FQ857297	FQ857297	_PIRI_CONTIG_0105;	Finished	1
FQ857298	FQ857298	_PIRI_CONTIG_0106;	Finished	1
FQ857299	FQ857299	_PIRI_CONTIG_0107;	Finished	1
FQ857300	FQ857300	_PIRI_CONTIG_0108;	Finished	1
FQ857301	FQ857301	_PIRI_CONTIG_0109;	Finished	1
FQ857302	FQ857302	_PIRI_CONTIG_0110;	Finished	1
FQ857303	FQ857303	_PIRI_CONTIG_0111;	Finished	1
FQ857304	FQ857304	_PIRI_CONTIG_0112;	Finished	1
FQ857305	FQ857305	_PIRI_CONTIG_0113;	Finished	1
FQ857306	FQ857306	_PIRI_CONTIG_0114;	Finished	1
FQ857307	FQ857307	_PIRI_CONTIG_0115;	Finished	1
FQ857308	FQ857308	_PIRI_CONTIG_0116;	Finished	1
FQ857309	FQ857309	_PIRI_CONTIG_0117;	Finished	1
FQ857310	FQ857310	_PIRI_CONTIG_0118;	Finished	1
FQ857311	FQ857311	_PIRI_CONTIG_0119;	Finished	1
FQ857312	FQ857312	_PIRI_CONTIG_0120;	Finished	1
FQ857313	FQ857313	_PIRI_CONTIG_0121;	Finished	1
FQ857314	FQ857314	_PIRI_CONTIG_0122;	Finished	1
FQ857315	FQ857315	_PIRI_CONTIG_0123;	Finished	1
FQ857316	FQ857316	_PIRI_CONTIG_0124;	Finished	1
FQ857317	FQ857317	_PIRI_CONTIG_0125;	Finished	1
FQ857318	FQ857318	_PIRI_CONTIG_0126;	Finished	1
FQ857319	FQ857319	_PIRI_CONTIG_0127;	Finished	1
FQ857320	FQ857320	_PIRI_CONTIG_0128;	Finished	1
FQ857321	FQ857321	_PIRI_CONTIG_0129;	Finished	1
FQ857322	FQ857322	_PIRI_CONTIG_0130;	Finished	1
FQ857323	FQ857323	_PIRI_CONTIG_0131;	Finished	1
FQ857324	FQ857324	_PIRI_CONTIG_0132;	Finished	1
FQ857325	FQ857325	_PIRI_CONTIG_0133;	Finished	1
FQ857326	FQ857326	_PIRI_CONTIG_0134;	Finished	1
FQ857327	FQ857327	_PIRI_CONTIG_0135;	Finished	1
FQ857328	FQ857328	_PIRI_CONTIG_0136;	Finished	1
FQ857329	FQ857329	_PIRI_CONTIG_0137;	Finished	1
FQ857330	FQ857330	_PIRI_CONTIG_0138;	Finished	1
FQ857331	FQ857331	_PIRI_CONTIG_0139;	Finished	1
FQ857332	FQ857332	_PIRI_CONTIG_0140;	Finished	1
FQ857333	FQ857333	_PIRI_CONTIG_0141;	Finished	1
FQ857334	FQ857334	_PIRI_CONTIG_0142;	Finished	1
FQ857335	FQ857335	_PIRI_CONTIG_0143;	Finished	1
FQ857336	FQ857336	_PIRI_CONTIG_0144;	Finished	1
FQ857337	FQ857337	_PIRI_CONTIG_0145;	Finished	1
FQ857338	FQ857338	_PIRI_CONTIG_0146;	Finished	1
FQ857339	FQ857339	_PIRI_CONTIG_0147;	Finished	1
FQ857340	FQ857340	_PIRI_CONTIG_0148;	Finished	1
FQ857341	FQ857341	_PIRI_CONTIG_0149;	Finished	1
FQ857342	FQ857342	_PIRI_CONTIG_0150;	Finished	1
FQ857343	FQ857343	_PIRI_CONTIG_0151;	Finished	1
FQ857344	FQ857344	_PIRI_CONTIG_0152;	Finished	1
FQ857345	FQ857345	_PIRI_CONTIG_0153;	Finished	1
FQ857346	FQ857346	_PIRI_CONTIG_0154;	Finished	1
FQ857347	FQ857347	_PIRI_CONTIG_0155;	Finished	1
FQ857348	FQ857348	_PIRI_CONTIG_0156;	Finished	1
FQ857349	FQ857349	_PIRI_CONTIG_0157;	Finished	1
FQ857350	FQ857350	_PIRI_CONTIG_0158;	Finished	1
FQ857351	FQ857351	_PIRI_CONTIG_0159;	Finished	1
FQ857352	FQ857352	_PIRI_CONTIG_0160;	Finished	1
FQ857353	FQ857353	_PIRI_CONTIG_0161;	Finished	1
FQ857354	FQ857354	_PIRI_CONTIG_0162;	Finished	1
FQ857355	FQ857355	_PIRI_CONTIG_0163;	Finished	1
FQ857356	FQ857356	_PIRI_CONTIG_0164;	Finished	1
FQ857357	FQ857357	_PIRI_CONTIG_0165;	Finished	1
FQ857358	FQ857358	_PIRI_CONTIG_0166;	Finished	1
FQ857359	FQ857359	_PIRI_CONTIG_0167;	Finished	1
FQ857360	FQ857360	_PIRI_CONTIG_0168;	Finished	1
FQ857361	FQ857361	_PIRI_CONTIG_0169;	Finished	1
FQ857362	FQ857362	_PIRI_CONTIG_0170;	Finished	1
FQ857363	FQ857363	_PIRI_CONTIG_0171;	Finished	1
FQ857364	FQ857364	_PIRI_CONTIG_0172;	Finished	1
FQ857365	FQ857365	_PIRI_CONTIG_0173;	Finished	1
FQ857366	FQ857366	_PIRI_CONTIG_0174;	Finished	1
FQ857367	FQ857367	_PIRI_CONTIG_0175;	Finished	1
FQ857368	FQ857368	_PIRI_CONTIG_0176;	Finished	1
FQ857369	FQ857369	_PIRI_CONTIG_0177;	Finished	1
FQ857370	FQ857370	_PIRI_CONTIG_0178;	Finished	1
FQ857371	FQ857371	_PIRI_CONTIG_0179;	Finished	1
FQ857372	FQ857372	_PIRI_CONTIG_0180;	Finished	1
FQ857373	FQ857373	_PIRI_CONTIG_0181;	Finished	1
FQ857374	FQ857374	_PIRI_CONTIG_0182;	Finished	1
FQ857375	FQ857375	_PIRI_CONTIG_0183;	Finished	1
FQ857376	FQ857376	_PIRI_CONTIG_0184;	Finished	1
FQ857377	FQ857377	_PIRI_CONTIG_0185;	Finished	1
FQ857378	FQ857378	_PIRI_CONTIG_0186;	Finished	1
FQ857379	FQ857379	_PIRI_CONTIG_0187;	Finished	1
FQ857380	FQ857380	_PIRI_CONTIG_0188;	Finished	1
FQ857381	FQ857381	_PIRI_CONTIG_0189;	Finished	1
FQ857382	FQ857382	_PIRI_CONTIG_0190;	Finished	1
FQ857383	FQ857383	_PIRI_CONTIG_0191;	Finished	1
FQ857384	FQ857384	_PIRI_CONTIG_0192;	Finished	1
FQ857385	FQ857385	_PIRI_CONTIG_0193;	Finished	1
FQ857386	FQ857386	_PIRI_CONTIG_0194;	Finished	1
FQ857387	FQ857387	_PIRI_CONTIG_0195;	Finished	1
FQ857388	FQ857388	_PIRI_CONTIG_0196;	Finished	1
FQ859086	FQ859086	_PIRI_CONTIG_0197;	Finished	1
FQ857389	FQ857389	_PIRI_CONTIG_0198;	Finished	1
FQ857390	FQ857390	_PIRI_CONTIG_0199;	Finished	1
FQ857391	FQ857391	_PIRI_CONTIG_0200;	Finished	1
FQ857392	FQ857392	_PIRI_CONTIG_0201;	Finished	1
FQ857393	FQ857393	_PIRI_CONTIG_0202;	Finished	1
FQ857394	FQ857394	_PIRI_CONTIG_0203;	Finished	1
FQ857395	FQ857395	_PIRI_CONTIG_0204;	Finished	1
FQ857396	FQ857396	_PIRI_CONTIG_0205;	Finished	1
FQ857397	FQ857397	_PIRI_CONTIG_0206;	Finished	1
FQ857398	FQ857398	_PIRI_CONTIG_0207;	Finished	1
FQ857399	FQ857399	_PIRI_CONTIG_0208;	Finished	1
FQ857400	FQ857400	_PIRI_CONTIG_0209;	Finished	1
FQ857401	FQ857401	_PIRI_CONTIG_0210;	Finished	1
FQ857402	FQ857402	_PIRI_CONTIG_0211;	Finished	1
FQ857403	FQ857403	_PIRI_CONTIG_0212;	Finished	1
FQ857404	FQ857404	_PIRI_CONTIG_0213;	Finished	1
FQ857405	FQ857405	_PIRI_CONTIG_0214;	Finished	1
FQ857406	FQ857406	_PIRI_CONTIG_0215;	Finished	1
FQ857407	FQ857407	_PIRI_CONTIG_0216;	Finished	1
FQ857408	FQ857408	_PIRI_CONTIG_0217;	Finished	1
FQ857409	FQ857409	_PIRI_CONTIG_0218;	Finished	1
FQ857410	FQ857410	_PIRI_CONTIG_0219;	Finished	1
FQ857411	FQ857411	_PIRI_CONTIG_0220;	Finished	1
FQ857412	FQ857412	_PIRI_CONTIG_0221;	Finished	1
FQ857413	FQ857413	_PIRI_CONTIG_0222;	Finished	1
FQ857414	FQ857414	_PIRI_CONTIG_0223;	Finished	1
FQ857415	FQ857415	_PIRI_CONTIG_0224;	Finished	1
FQ857416	FQ857416	_PIRI_CONTIG_0225;	Finished	1
FQ857417	FQ857417	_PIRI_CONTIG_0226;	Finished	1
FQ857418	FQ857418	_PIRI_CONTIG_0227;	Finished	1
FQ857419	FQ857419	_PIRI_CONTIG_0228;	Finished	1
FQ857420	FQ857420	_PIRI_CONTIG_0229;	Finished	1
FQ857421	FQ857421	_PIRI_CONTIG_0230;	Finished	1
FQ857422	FQ857422	_PIRI_CONTIG_0231;	Finished	1
FQ857423	FQ857423	_PIRI_CONTIG_0232;	Finished	1
FQ857424	FQ857424	_PIRI_CONTIG_0233;	Finished	1
FQ857425	FQ857425	_PIRI_CONTIG_0234;	Finished	1
FQ857426	FQ857426	_PIRI_CONTIG_0235;	Finished	1
FQ857427	FQ857427	_PIRI_CONTIG_0236;	Finished	1
FQ857428	FQ857428	_PIRI_CONTIG_0237;	Finished	1
FQ857429	FQ857429	_PIRI_CONTIG_0238;	Finished	1
FQ857430	FQ857430	_PIRI_CONTIG_0239;	Finished	1
FQ857431	FQ857431	_PIRI_CONTIG_0240;	Finished	1
FQ857432	FQ857432	_PIRI_CONTIG_0241;	Finished	1
FQ857433	FQ857433	_PIRI_CONTIG_0242;	Finished	1
FQ857434	FQ857434	_PIRI_CONTIG_0243;	Finished	1
FQ857435	FQ857435	_PIRI_CONTIG_0244;	Finished	1
FQ857436	FQ857436	_PIRI_CONTIG_0245;	Finished	1
FQ857437	FQ857437	_PIRI_CONTIG_0246;	Finished	1
FQ857438	FQ857438	_PIRI_CONTIG_0247;	Finished	1
FQ857439	FQ857439	_PIRI_CONTIG_0248;	Finished	1
FQ857440	FQ857440	_PIRI_CONTIG_0249;	Finished	1
FQ857441	FQ857441	_PIRI_CONTIG_0250;	Finished	1
FQ857442	FQ857442	_PIRI_CONTIG_0251;	Finished	1
FQ857443	FQ857443	_PIRI_CONTIG_0252;	Finished	1
FQ857444	FQ857444	_PIRI_CONTIG_0253;	Finished	1
FQ857445	FQ857445	_PIRI_CONTIG_0254;	Finished	1
FQ857446	FQ857446	_PIRI_CONTIG_0255;	Finished	1
FQ857447	FQ857447	_PIRI_CONTIG_0256;	Finished	1
FQ857448	FQ857448	_PIRI_CONTIG_0257;	Finished	1
FQ857449	FQ857449	_PIRI_CONTIG_0258;	Finished	1
FQ857450	FQ857450	_PIRI_CONTIG_0259;	Finished	1
FQ857451	FQ857451	_PIRI_CONTIG_0260;	Finished	1
FQ857452	FQ857452	_PIRI_CONTIG_0261;	Finished	1
FQ857453	FQ857453	_PIRI_CONTIG_0262;	Finished	1
FQ857454	FQ857454	_PIRI_CONTIG_0263;	Finished	1
FQ857455	FQ857455	_PIRI_CONTIG_0264;	Finished	1
FQ857456	FQ857456	_PIRI_CONTIG_0265;	Finished	1
FQ857457	FQ857457	_PIRI_CONTIG_0266;	Finished	1
FQ857458	FQ857458	_PIRI_CONTIG_0267;	Finished	1
FQ857459	FQ857459	_PIRI_CONTIG_0268;	Finished	1
FQ857460	FQ857460	_PIRI_CONTIG_0269;	Finished	1
FQ857461	FQ857461	_PIRI_CONTIG_0270;	Finished	1
FQ857462	FQ857462	_PIRI_CONTIG_0271;	Finished	1
FQ857463	FQ857463	_PIRI_CONTIG_0272;	Finished	1
FQ857464	FQ857464	_PIRI_CONTIG_0273;	Finished	1
FQ857465	FQ857465	_PIRI_CONTIG_0274;	Finished	1
FQ857466	FQ857466	_PIRI_CONTIG_0275;	Finished	1
FQ857467	FQ857467	_PIRI_CONTIG_0276;	Finished	1
FQ857468	FQ857468	_PIRI_CONTIG_0277;	Finished	1
FQ857469	FQ857469	_PIRI_CONTIG_0278;	Finished	1
FQ857470	FQ857470	_PIRI_CONTIG_0279;	Finished	1
FQ857471	FQ857471	_PIRI_CONTIG_0280;	Finished	1
FQ857472	FQ857472	_PIRI_CONTIG_0281;	Finished	1
FQ857473	FQ857473	_PIRI_CONTIG_0282;	Finished	1
FQ857474	FQ857474	_PIRI_CONTIG_0283;	Finished	1
FQ857475	FQ857475	_PIRI_CONTIG_0284;	Finished	1
FQ857476	FQ857476	_PIRI_CONTIG_0285;	Finished	1
FQ857477	FQ857477	_PIRI_CONTIG_0286;	Finished	1
FQ857478	FQ857478	_PIRI_CONTIG_0287;	Finished	1
FQ857479	FQ857479	_PIRI_CONTIG_0288;	Finished	1
FQ857480	FQ857480	_PIRI_CONTIG_0289;	Finished	1
FQ857481	FQ857481	_PIRI_CONTIG_0290;	Finished	1
FQ857482	FQ857482	_PIRI_CONTIG_0291;	Finished	1
FQ857483	FQ857483	_PIRI_CONTIG_0292;	Finished	1
FQ857484	FQ857484	_PIRI_CONTIG_0293;	Finished	1
FQ857485	FQ857485	_PIRI_CONTIG_0294;	Finished	1
FQ857486	FQ857486	_PIRI_CONTIG_0295;	Finished	1
FQ857487	FQ857487	_PIRI_CONTIG_0296;	Finished	1
FQ857488	FQ857488	_PIRI_CONTIG_0297;	Finished	1
FQ857489	FQ857489	_PIRI_CONTIG_0298;	Finished	1
FQ857490	FQ857490	_PIRI_CONTIG_0299;	Finished	1
FQ857491	FQ857491	_PIRI_CONTIG_0300;	Finished	1
FQ857492	FQ857492	_PIRI_CONTIG_0301;	Finished	1
FQ857493	FQ857493	_PIRI_CONTIG_0302;	Finished	1
FQ857494	FQ857494	_PIRI_CONTIG_0303;	Finished	1
FQ857495	FQ857495	_PIRI_CONTIG_0304;	Finished	1
FQ857496	FQ857496	_PIRI_CONTIG_0305;	Finished	1
FQ857497	FQ857497	_PIRI_CONTIG_0306;	Finished	1
FQ857498	FQ857498	_PIRI_CONTIG_0307;	Finished	1
FQ857499	FQ857499	_PIRI_CONTIG_0308;	Finished	1
FQ857500	FQ857500	_PIRI_CONTIG_0309;	Finished	1
FQ857501	FQ857501	_PIRI_CONTIG_0310;	Finished	1
FQ857502	FQ857502	_PIRI_CONTIG_0311;	Finished	1
FQ857503	FQ857503	_PIRI_CONTIG_0312;	Finished	1
FQ857504	FQ857504	_PIRI_CONTIG_0313;	Finished	1
FQ857505	FQ857505	_PIRI_CONTIG_0314;	Finished	1
FQ857506	FQ857506	_PIRI_CONTIG_0315;	Finished	1
FQ857507	FQ857507	_PIRI_CONTIG_0316;	Finished	1
FQ857508	FQ857508	_PIRI_CONTIG_0317;	Finished	1
FQ857509	FQ857509	_PIRI_CONTIG_0318;	Finished	1
FQ857510	FQ857510	_PIRI_CONTIG_0319;	Finished	1
FQ857511	FQ857511	_PIRI_CONTIG_0320;	Finished	1
FQ857512	FQ857512	_PIRI_CONTIG_0321;	Finished	1
FQ857513	FQ857513	_PIRI_CONTIG_0322;	Finished	1
FQ857514	FQ857514	_PIRI_CONTIG_0323;	Finished	1
FQ857515	FQ857515	_PIRI_CONTIG_0324;	Finished	1
FQ857516	FQ857516	_PIRI_CONTIG_0325;	Finished	1
FQ857517	FQ857517	_PIRI_CONTIG_0326;	Finished	1
FQ857518	FQ857518	_PIRI_CONTIG_0327;	Finished	1
FQ857519	FQ857519	_PIRI_CONTIG_0328;	Finished	1
FQ857520	FQ857520	_PIRI_CONTIG_0329;	Finished	1
FQ857521	FQ857521	_PIRI_CONTIG_0330;	Finished	1
FQ857522	FQ857522	_PIRI_CONTIG_0331;	Finished	1
FQ857523	FQ857523	_PIRI_CONTIG_0332;	Finished	1
FQ857524	FQ857524	_PIRI_CONTIG_0333;	Finished	1
FQ857525	FQ857525	_PIRI_CONTIG_0334;	Finished	1
FQ857526	FQ857526	_PIRI_CONTIG_0335;	Finished	1
FQ857527	FQ857527	_PIRI_CONTIG_0336;	Finished	1
FQ857528	FQ857528	_PIRI_CONTIG_0337;	Finished	1
FQ857529	FQ857529	_PIRI_CONTIG_0338;	Finished	1
FQ857530	FQ857530	_PIRI_CONTIG_0339;	Finished	1
FQ857531	FQ857531	_PIRI_CONTIG_0340;	Finished	1
FQ857532	FQ857532	_PIRI_CONTIG_0341;	Finished	1
FQ857533	FQ857533	_PIRI_CONTIG_0342;	Finished	1
FQ857534	FQ857534	_PIRI_CONTIG_0343;	Finished	1
FQ857535	FQ857535	_PIRI_CONTIG_0344;	Finished	1
FQ857536	FQ857536	_PIRI_CONTIG_0345;	Finished	1
FQ857537	FQ857537	_PIRI_CONTIG_0346;	Finished	1
FQ857538	FQ857538	_PIRI_CONTIG_0347;	Finished	1
FQ857539	FQ857539	_PIRI_CONTIG_0348;	Finished	1
FQ857540	FQ857540	_PIRI_CONTIG_0349;	Finished	1
FQ857541	FQ857541	_PIRI_CONTIG_0350;	Finished	1
FQ859071	FQ859071	_PIRI_CONTIG_0351;	Finished	1
FQ857543	FQ857543	_PIRI_CONTIG_0352;	Finished	1
FQ857544	FQ857544	_PIRI_CONTIG_0353;	Finished	1
FQ857545	FQ857545	_PIRI_CONTIG_0354;	Finished	1
FQ857546	FQ857546	_PIRI_CONTIG_0355;	Finished	1
FQ857547	FQ857547	_PIRI_CONTIG_0356;	Finished	1
FQ857548	FQ857548	_PIRI_CONTIG_0357;	Finished	1
FQ857549	FQ857549	_PIRI_CONTIG_0358;	Finished	1
FQ857550	FQ857550	_PIRI_CONTIG_0359;	Finished	1
FQ857551	FQ857551	_PIRI_CONTIG_0360;	Finished	1
FQ859081	FQ859081	_PIRI_CONTIG_0361;	Finished	1
FQ857552	FQ857552	_PIRI_CONTIG_0362;	Finished	1
FQ857553	FQ857553	_PIRI_CONTIG_0363;	Finished	1
FQ857554	FQ857554	_PIRI_CONTIG_0364;	Finished	1
FQ857555	FQ857555	_PIRI_CONTIG_0365;	Finished	1
FQ857556	FQ857556	_PIRI_CONTIG_0366;	Finished	1
FQ857557	FQ857557	_PIRI_CONTIG_0367;	Finished	1
FQ857558	FQ857558	_PIRI_CONTIG_0368;	Finished	1
FQ857559	FQ857559	_PIRI_CONTIG_0369;	Finished	1
FQ857560	FQ857560	_PIRI_CONTIG_0370;	Finished	1
FQ857561	FQ857561	_PIRI_CONTIG_0371;	Finished	1
FQ857562	FQ857562	_PIRI_CONTIG_0372;	Finished	1
FQ857563	FQ857563	_PIRI_CONTIG_0373;	Finished	1
FQ857564	FQ857564	_PIRI_CONTIG_0374;	Finished	1
FQ857565	FQ857565	_PIRI_CONTIG_0375;	Finished	1
FQ857566	FQ857566	_PIRI_CONTIG_0376;	Finished	1
FQ857567	FQ857567	_PIRI_CONTIG_0377;	Finished	1
FQ857568	FQ857568	_PIRI_CONTIG_0378;	Finished	1
FQ857569	FQ857569	_PIRI_CONTIG_0379;	Finished	1
FQ857570	FQ857570	_PIRI_CONTIG_0380;	Finished	1
FQ857571	FQ857571	_PIRI_CONTIG_0381;	Finished	1
FQ857572	FQ857572	_PIRI_CONTIG_0382;	Finished	1
FQ859084	FQ859084	_PIRI_CONTIG_0383;	Finished	1
FQ857573	FQ857573	_PIRI_CONTIG_0384;	Finished	1
FQ857574	FQ857574	_PIRI_CONTIG_0385;	Finished	1
FQ857575	FQ857575	_PIRI_CONTIG_0386;	Finished	1
FQ857576	FQ857576	_PIRI_CONTIG_0387;	Finished	1
FQ857577	FQ857577	_PIRI_CONTIG_0388;	Finished	1
FQ857578	FQ857578	_PIRI_CONTIG_0389;	Finished	1
FQ857579	FQ857579	_PIRI_CONTIG_0390;	Finished	1
FQ857580	FQ857580	_PIRI_CONTIG_0391;	Finished	1
FQ859072	FQ859072	_PIRI_CONTIG_0392;	Finished	1
FQ857582	FQ857582	_PIRI_CONTIG_0393;	Finished	1
FQ857583	FQ857583	_PIRI_CONTIG_0394;	Finished	1
FQ857584	FQ857584	_PIRI_CONTIG_0395;	Finished	1
FQ857585	FQ857585	_PIRI_CONTIG_0396;	Finished	1
FQ857586	FQ857586	_PIRI_CONTIG_0397;	Finished	1
FQ857587	FQ857587	_PIRI_CONTIG_0398;	Finished	1
FQ857588	FQ857588	_PIRI_CONTIG_0399;	Finished	1
FQ857589	FQ857589	_PIRI_CONTIG_0400;	Finished	1
FQ857590	FQ857590	_PIRI_CONTIG_0401;	Finished	1
FQ857591	FQ857591	_PIRI_CONTIG_0402;	Finished	1
FQ857592	FQ857592	_PIRI_CONTIG_0403;	Finished	1
FQ857593	FQ857593	_PIRI_CONTIG_0404;	Finished	1
FQ857594	FQ857594	_PIRI_CONTIG_0405;	Finished	1
FQ857595	FQ857595	_PIRI_CONTIG_0406;	Finished	1
FQ857596	FQ857596	_PIRI_CONTIG_0407;	Finished	1
FQ857597	FQ857597	_PIRI_CONTIG_0408;	Finished	1
FQ857598	FQ857598	_PIRI_CONTIG_0409;	Finished	1
FQ857599	FQ857599	_PIRI_CONTIG_0410;	Finished	1
FQ857600	FQ857600	_PIRI_CONTIG_0411;	Finished	1
FQ857601	FQ857601	_PIRI_CONTIG_0412;	Finished	1
FQ857602	FQ857602	_PIRI_CONTIG_0413;	Finished	1
FQ857603	FQ857603	_PIRI_CONTIG_0414;	Finished	1
FQ857604	FQ857604	_PIRI_CONTIG_0415;	Finished	1
FQ857605	FQ857605	_PIRI_CONTIG_0416;	Finished	1
FQ857606	FQ857606	_PIRI_CONTIG_0417;	Finished	1
FQ857607	FQ857607	_PIRI_CONTIG_0418;	Finished	1
FQ857608	FQ857608	_PIRI_CONTIG_0419;	Finished	1
FQ857609	FQ857609	_PIRI_CONTIG_0420;	Finished	1
FQ857610	FQ857610	_PIRI_CONTIG_0421;	Finished	1
FQ857611	FQ857611	_PIRI_CONTIG_0422;	Finished	1
FQ857612	FQ857612	_PIRI_CONTIG_0423;	Finished	1
FQ857613	FQ857613	_PIRI_CONTIG_0424;	Finished	1
FQ857614	FQ857614	_PIRI_CONTIG_0425;	Finished	1
FQ857615	FQ857615	_PIRI_CONTIG_0426;	Finished	1
FQ857616	FQ857616	_PIRI_CONTIG_0427;	Finished	1
FQ857617	FQ857617	_PIRI_CONTIG_0428;	Finished	1
FQ857618	FQ857618	_PIRI_CONTIG_0429;	Finished	1
FQ857619	FQ857619	_PIRI_CONTIG_0430;	Finished	1
FQ857620	FQ857620	_PIRI_CONTIG_0431;	Finished	1
FQ857621	FQ857621	_PIRI_CONTIG_0432;	Finished	1
FQ857622	FQ857622	_PIRI_CONTIG_0433;	Finished	1
FQ857623	FQ857623	_PIRI_CONTIG_0434;	Finished	1
FQ857624	FQ857624	_PIRI_CONTIG_0435;	Finished	1
FQ857625	FQ857625	_PIRI_CONTIG_0436;	Finished	1
FQ857626	FQ857626	_PIRI_CONTIG_0437;	Finished	1
FQ857627	FQ857627	_PIRI_CONTIG_0438;	Finished	1
FQ857628	FQ857628	_PIRI_CONTIG_0439;	Finished	1
FQ857629	FQ857629	_PIRI_CONTIG_0440;	Finished	1
FQ857630	FQ857630	_PIRI_CONTIG_0441;	Finished	1
FQ857631	FQ857631	_PIRI_CONTIG_0442;	Finished	1
FQ857632	FQ857632	_PIRI_CONTIG_0443;	Finished	1
FQ857633	FQ857633	_PIRI_CONTIG_0444;	Finished	1
FQ857634	FQ857634	_PIRI_CONTIG_0445;	Finished	1
FQ857635	FQ857635	_PIRI_CONTIG_0446;	Finished	1
FQ857636	FQ857636	_PIRI_CONTIG_0447;	Finished	1
FQ857637	FQ857637	_PIRI_CONTIG_0448;	Finished	1
FQ857638	FQ857638	_PIRI_CONTIG_0449;	Finished	1
FQ857639	FQ857639	_PIRI_CONTIG_0450;	Finished	1
FQ857640	FQ857640	_PIRI_CONTIG_0451;	Finished	1
FQ857641	FQ857641	_PIRI_CONTIG_0452;	Finished	1
FQ857642	FQ857642	_PIRI_CONTIG_0453;	Finished	1
FQ857643	FQ857643	_PIRI_CONTIG_0454;	Finished	1
FQ857644	FQ857644	_PIRI_CONTIG_0455;	Finished	1
FQ857645	FQ857645	_PIRI_CONTIG_0456;	Finished	1
FQ857646	FQ857646	_PIRI_CONTIG_0457;	Finished	1
FQ857647	FQ857647	_PIRI_CONTIG_0458;	Finished	1
FQ857648	FQ857648	_PIRI_CONTIG_0459;	Finished	1
FQ857649	FQ857649	_PIRI_CONTIG_0460;	Finished	1
FQ857650	FQ857650	_PIRI_CONTIG_0461;	Finished	1
FQ857651	FQ857651	_PIRI_CONTIG_0462;	Finished	1
FQ857652	FQ857652	_PIRI_CONTIG_0463;	Finished	1
FQ857653	FQ857653	_PIRI_CONTIG_0464;	Finished	1
FQ857654	FQ857654	_PIRI_CONTIG_0465;	Finished	1
FQ857655	FQ857655	_PIRI_CONTIG_0466;	Finished	1
FQ857656	FQ857656	_PIRI_CONTIG_0467;	Finished	1
FQ857657	FQ857657	_PIRI_CONTIG_0468;	Finished	1
FQ857658	FQ857658	_PIRI_CONTIG_0469;	Finished	1
FQ857659	FQ857659	_PIRI_CONTIG_0470;	Finished	1
FQ857660	FQ857660	_PIRI_CONTIG_0471;	Finished	1
FQ857661	FQ857661	_PIRI_CONTIG_0472;	Finished	1
FQ857662	FQ857662	_PIRI_CONTIG_0473;	Finished	1
FQ857663	FQ857663	_PIRI_CONTIG_0474;	Finished	1
FQ857664	FQ857664	_PIRI_CONTIG_0475;	Finished	1
FQ857665	FQ857665	_PIRI_CONTIG_0476;	Finished	1
FQ857666	FQ857666	_PIRI_CONTIG_0477;	Finished	1
FQ859083	FQ859083	_PIRI_CONTIG_0478;	Finished	1
FQ857667	FQ857667	_PIRI_CONTIG_0479;	Finished	1
FQ857668	FQ857668	_PIRI_CONTIG_0480;	Finished	1
FQ857669	FQ857669	_PIRI_CONTIG_0481;	Finished	1
FQ857670	FQ857670	_PIRI_CONTIG_0482;	Finished	1
FQ857671	FQ857671	_PIRI_CONTIG_0483;	Finished	1
FQ857672	FQ857672	_PIRI_CONTIG_0484;	Finished	1
FQ857673	FQ857673	_PIRI_CONTIG_0485;	Finished	1
FQ857674	FQ857674	_PIRI_CONTIG_0486;	Finished	1
FQ857675	FQ857675	_PIRI_CONTIG_0487;	Finished	1
FQ857676	FQ857676	_PIRI_CONTIG_0488;	Finished	1
FQ857677	FQ857677	_PIRI_CONTIG_0489;	Finished	1
FQ857678	FQ857678	_PIRI_CONTIG_0490;	Finished	1
FQ857679	FQ857679	_PIRI_CONTIG_0491;	Finished	1
FQ857680	FQ857680	_PIRI_CONTIG_0492;	Finished	1
FQ857681	FQ857681	_PIRI_CONTIG_0493;	Finished	1
FQ857682	FQ857682	_PIRI_CONTIG_0494;	Finished	1
FQ857683	FQ857683	_PIRI_CONTIG_0495;	Finished	1
FQ857684	FQ857684	_PIRI_CONTIG_0496;	Finished	1
FQ857685	FQ857685	_PIRI_CONTIG_0497;	Finished	1
FQ857686	FQ857686	_PIRI_CONTIG_0498;	Finished	1
FQ857687	FQ857687	_PIRI_CONTIG_0499;	Finished	1
FQ857688	FQ857688	_PIRI_CONTIG_0500;	Finished	1
FQ857689	FQ857689	_PIRI_CONTIG_0501;	Finished	1
FQ857690	FQ857690	_PIRI_CONTIG_0502;	Finished	1
FQ857691	FQ857691	_PIRI_CONTIG_0503;	Finished	1
FQ857692	FQ857692	_PIRI_CONTIG_0504;	Finished	1
FQ857693	FQ857693	_PIRI_CONTIG_0505;	Finished	1
FQ857694	FQ857694	_PIRI_CONTIG_0506;	Finished	1
FQ857695	FQ857695	_PIRI_CONTIG_0507;	Finished	1
FQ857696	FQ857696	_PIRI_CONTIG_0508;	Finished	1
FQ857697	FQ857697	_PIRI_CONTIG_0509;	Finished	1
FQ857698	FQ857698	_PIRI_CONTIG_0510;	Finished	1
FQ857699	FQ857699	_PIRI_CONTIG_0511;	Finished	1
FQ857700	FQ857700	_PIRI_CONTIG_0512;	Finished	1
FQ857701	FQ857701	_PIRI_CONTIG_0513;	Finished	1
FQ857702	FQ857702	_PIRI_CONTIG_0514;	Finished	1
FQ857703	FQ857703	_PIRI_CONTIG_0515;	Finished	1
FQ857704	FQ857704	_PIRI_CONTIG_0516;	Finished	1
FQ857705	FQ857705	_PIRI_CONTIG_0517;	Finished	1
FQ857706	FQ857706	_PIRI_CONTIG_0518;	Finished	1
FQ857707	FQ857707	_PIRI_CONTIG_0519;	Finished	1
FQ857708	FQ857708	_PIRI_CONTIG_0520;	Finished	1
FQ857709	FQ857709	_PIRI_CONTIG_0521;	Finished	1
FQ857710	FQ857710	_PIRI_CONTIG_0522;	Finished	1
FQ857711	FQ857711	_PIRI_CONTIG_0523;	Finished	1
FQ857712	FQ857712	_PIRI_CONTIG_0524;	Finished	1
FQ857713	FQ857713	_PIRI_CONTIG_0525;	Finished	1
FQ857714	FQ857714	_PIRI_CONTIG_0526;	Finished	1
FQ857715	FQ857715	_PIRI_CONTIG_0527;	Finished	1
FQ857716	FQ857716	_PIRI_CONTIG_0528;	Finished	1
FQ857717	FQ857717	_PIRI_CONTIG_0529;	Finished	1
FQ857718	FQ857718	_PIRI_CONTIG_0530;	Finished	1
FQ857719	FQ857719	_PIRI_CONTIG_0531;	Finished	1
FQ857720	FQ857720	_PIRI_CONTIG_0532;	Finished	1
FQ857721	FQ857721	_PIRI_CONTIG_0533;	Finished	1
FQ857722	FQ857722	_PIRI_CONTIG_0534;	Finished	1
FQ857723	FQ857723	_PIRI_CONTIG_0535;	Finished	1
FQ857724	FQ857724	_PIRI_CONTIG_0536;	Finished	1
FQ857725	FQ857725	_PIRI_CONTIG_0537;	Finished	1
FQ857726	FQ857726	_PIRI_CONTIG_0538;	Finished	1
FQ857727	FQ857727	_PIRI_CONTIG_0539;	Finished	1
FQ857728	FQ857728	_PIRI_CONTIG_0540;	Finished	1
FQ857729	FQ857729	_PIRI_CONTIG_0541;	Finished	1
FQ857730	FQ857730	_PIRI_CONTIG_0542;	Finished	1
FQ857731	FQ857731	_PIRI_CONTIG_0543;	Finished	1
FQ857732	FQ857732	_PIRI_CONTIG_0544;	Finished	1
FQ857733	FQ857733	_PIRI_CONTIG_0545;	Finished	1
FQ857734	FQ857734	_PIRI_CONTIG_0546;	Finished	1
FQ859078	FQ859078	_PIRI_CONTIG_0547;	Finished	1
FQ857736	FQ857736	_PIRI_CONTIG_0548;	Finished	1
FQ857737	FQ857737	_PIRI_CONTIG_0549;	Finished	1
FQ857738	FQ857738	_PIRI_CONTIG_0550;	Finished	1
FQ857739	FQ857739	_PIRI_CONTIG_0551;	Finished	1
FQ857740	FQ857740	_PIRI_CONTIG_0552;	Finished	1
FQ857741	FQ857741	_PIRI_CONTIG_0553;	Finished	1
FQ857742	FQ857742	_PIRI_CONTIG_0554;	Finished	1
FQ857743	FQ857743	_PIRI_CONTIG_0555;	Finished	1
FQ857744	FQ857744	_PIRI_CONTIG_0556;	Finished	1
FQ857745	FQ857745	_PIRI_CONTIG_0557;	Finished	1
FQ857746	FQ857746	_PIRI_CONTIG_0558;	Finished	1
FQ857747	FQ857747	_PIRI_CONTIG_0559;	Finished	1
FQ857748	FQ857748	_PIRI_CONTIG_0560;	Finished	1
FQ857749	FQ857749	_PIRI_CONTIG_0561;	Finished	1
FQ857750	FQ857750	_PIRI_CONTIG_0562;	Finished	1
FQ857751	FQ857751	_PIRI_CONTIG_0563;	Finished	1
FQ857752	FQ857752	_PIRI_CONTIG_0564;	Finished	1
FQ857753	FQ857753	_PIRI_CONTIG_0565;	Finished	1
FQ857754	FQ857754	_PIRI_CONTIG_0566;	Finished	1
FQ857755	FQ857755	_PIRI_CONTIG_0567;	Finished	1
FQ857756	FQ857756	_PIRI_CONTIG_0568;	Finished	1
FQ857757	FQ857757	_PIRI_CONTIG_0569;	Finished	1
FQ857758	FQ857758	_PIRI_CONTIG_0570;	Finished	1
FQ857759	FQ857759	_PIRI_CONTIG_0571;	Finished	1
FQ857760	FQ857760	_PIRI_CONTIG_0572;	Finished	1
FQ857761	FQ857761	_PIRI_CONTIG_0573;	Finished	1
FQ857762	FQ857762	_PIRI_CONTIG_0574;	Finished	1
FQ857763	FQ857763	_PIRI_CONTIG_0575;	Finished	1
FQ857764	FQ857764	_PIRI_CONTIG_0576;	Finished	1
FQ857765	FQ857765	_PIRI_CONTIG_0577;	Finished	1
FQ857766	FQ857766	_PIRI_CONTIG_0578;	Finished	1
FQ857767	FQ857767	_PIRI_CONTIG_0579;	Finished	1
FQ859074	FQ859074	_PIRI_CONTIG_0580;	Finished	1
FQ857769	FQ857769	_PIRI_CONTIG_0581;	Finished	1
FQ857770	FQ857770	_PIRI_CONTIG_0582;	Finished	1
FQ857771	FQ857771	_PIRI_CONTIG_0583;	Finished	1
FQ857772	FQ857772	_PIRI_CONTIG_0584;	Finished	1
FQ857773	FQ857773	_PIRI_CONTIG_0585;	Finished	1
FQ857774	FQ857774	_PIRI_CONTIG_0586;	Finished	1
FQ857775	FQ857775	_PIRI_CONTIG_0587;	Finished	1
FQ857776	FQ857776	_PIRI_CONTIG_0588;	Finished	1
FQ857777	FQ857777	_PIRI_CONTIG_0589;	Finished	1
FQ857778	FQ857778	_PIRI_CONTIG_0590;	Finished	1
FQ857779	FQ857779	_PIRI_CONTIG_0591;	Finished	1
FQ857780	FQ857780	_PIRI_CONTIG_0592;	Finished	1
FQ857781	FQ857781	_PIRI_CONTIG_0593;	Finished	1
FQ857782	FQ857782	_PIRI_CONTIG_0594;	Finished	1
FQ857783	FQ857783	_PIRI_CONTIG_0595;	Finished	1
FQ857784	FQ857784	_PIRI_CONTIG_0596;	Finished	1
FQ857785	FQ857785	_PIRI_CONTIG_0597;	Finished	1
FQ857786	FQ857786	_PIRI_CONTIG_0598;	Finished	1
FQ857787	FQ857787	_PIRI_CONTIG_0599;	Finished	1
FQ857788	FQ857788	_PIRI_CONTIG_0600;	Finished	1
FQ857789	FQ857789	_PIRI_CONTIG_0601;	Finished	1
FQ857790	FQ857790	_PIRI_CONTIG_0602;	Finished	1
FQ857791	FQ857791	_PIRI_CONTIG_0603;	Finished	1
FQ857792	FQ857792	_PIRI_CONTIG_0604;	Finished	1
FQ857793	FQ857793	_PIRI_CONTIG_0605;	Finished	1
FQ857794	FQ857794	_PIRI_CONTIG_0606;	Finished	1
FQ857795	FQ857795	_PIRI_CONTIG_0607;	Finished	1
FQ857796	FQ857796	_PIRI_CONTIG_0608;	Finished	1
FQ857797	FQ857797	_PIRI_CONTIG_0609;	Finished	1
FQ857798	FQ857798	_PIRI_CONTIG_0610;	Finished	1
FQ857799	FQ857799	_PIRI_CONTIG_0611;	Finished	1
FQ857800	FQ857800	_PIRI_CONTIG_0612;	Finished	1
FQ857801	FQ857801	_PIRI_CONTIG_0613;	Finished	1
FQ857802	FQ857802	_PIRI_CONTIG_0614;	Finished	1
FQ857803	FQ857803	_PIRI_CONTIG_0615;	Finished	1
FQ857804	FQ857804	_PIRI_CONTIG_0616;	Finished	1
FQ857805	FQ857805	_PIRI_CONTIG_0617;	Finished	1
FQ857806	FQ857806	_PIRI_CONTIG_0618;	Finished	1
FQ857807	FQ857807	_PIRI_CONTIG_0619;	Finished	1
FQ857808	FQ857808	_PIRI_CONTIG_0620;	Finished	1
FQ857809	FQ857809	_PIRI_CONTIG_0621;	Finished	1
FQ857810	FQ857810	_PIRI_CONTIG_0622;	Finished	1
FQ857811	FQ857811	_PIRI_CONTIG_0623;	Finished	1
FQ857812	FQ857812	_PIRI_CONTIG_0624;	Finished	1
FQ857813	FQ857813	_PIRI_CONTIG_0625;	Finished	1
FQ857814	FQ857814	_PIRI_CONTIG_0626;	Finished	1
FQ857815	FQ857815	_PIRI_CONTIG_0627;	Finished	1
FQ857816	FQ857816	_PIRI_CONTIG_0628;	Finished	1
FQ857817	FQ857817	_PIRI_CONTIG_0629;	Finished	1
FQ857818	FQ857818	_PIRI_CONTIG_0630;	Finished	1
FQ857819	FQ857819	_PIRI_CONTIG_0631;	Finished	1
FQ857820	FQ857820	_PIRI_CONTIG_0632;	Finished	1
FQ857821	FQ857821	_PIRI_CONTIG_0633;	Finished	1
FQ857822	FQ857822	_PIRI_CONTIG_0634;	Finished	1
FQ857823	FQ857823	_PIRI_CONTIG_0635;	Finished	1
FQ857824	FQ857824	_PIRI_CONTIG_0636;	Finished	1
FQ857825	FQ857825	_PIRI_CONTIG_0637;	Finished	1
FQ857826	FQ857826	_PIRI_CONTIG_0638;	Finished	1
FQ857827	FQ857827	_PIRI_CONTIG_0639;	Finished	1
FQ857828	FQ857828	_PIRI_CONTIG_0640;	Finished	1
FQ857829	FQ857829	_PIRI_CONTIG_0641;	Finished	1
FQ857830	FQ857830	_PIRI_CONTIG_0642;	Finished	1
FQ857831	FQ857831	_PIRI_CONTIG_0643;	Finished	1
FQ857832	FQ857832	_PIRI_CONTIG_0644;	Finished	1
FQ857833	FQ857833	_PIRI_CONTIG_0645;	Finished	1
FQ857834	FQ857834	_PIRI_CONTIG_0646;	Finished	1
FQ857835	FQ857835	_PIRI_CONTIG_0647;	Finished	1
FQ857836	FQ857836	_PIRI_CONTIG_0648;	Finished	1
FQ857837	FQ857837	_PIRI_CONTIG_0649;	Finished	1
FQ857838	FQ857838	_PIRI_CONTIG_0650;	Finished	1
FQ857839	FQ857839	_PIRI_CONTIG_0651;	Finished	1
FQ857840	FQ857840	_PIRI_CONTIG_0652;	Finished	1
FQ857841	FQ857841	_PIRI_CONTIG_0653;	Finished	1
FQ857842	FQ857842	_PIRI_CONTIG_0654;	Finished	1
FQ857843	FQ857843	_PIRI_CONTIG_0655;	Finished	1
FQ857844	FQ857844	_PIRI_CONTIG_0656;	Finished	1
FQ857845	FQ857845	_PIRI_CONTIG_0657;	Finished	1
FQ857846	FQ857846	_PIRI_CONTIG_0658;	Finished	1
FQ857847	FQ857847	_PIRI_CONTIG_0659;	Finished	1
FQ857848	FQ857848	_PIRI_CONTIG_0660;	Finished	1
FQ857849	FQ857849	_PIRI_CONTIG_0661;	Finished	1
FQ857850	FQ857850	_PIRI_CONTIG_0662;	Finished	1
FQ857851	FQ857851	_PIRI_CONTIG_0663;	Finished	1
FQ857852	FQ857852	_PIRI_CONTIG_0664;	Finished	1
FQ857853	FQ857853	_PIRI_CONTIG_0665;	Finished	1
FQ857854	FQ857854	_PIRI_CONTIG_0666;	Finished	1
FQ857855	FQ857855	_PIRI_CONTIG_0667;	Finished	1
FQ857856	FQ857856	_PIRI_CONTIG_0668;	Finished	1
FQ857857	FQ857857	_PIRI_CONTIG_0669;	Finished	1
FQ857858	FQ857858	_PIRI_CONTIG_0670;	Finished	1
FQ857859	FQ857859	_PIRI_CONTIG_0671;	Finished	1
FQ857860	FQ857860	_PIRI_CONTIG_0672;	Finished	1
FQ857861	FQ857861	_PIRI_CONTIG_0673;	Finished	1
FQ857862	FQ857862	_PIRI_CONTIG_0674;	Finished	1
FQ857863	FQ857863	_PIRI_CONTIG_0675;	Finished	1
FQ857864	FQ857864	_PIRI_CONTIG_0676;	Finished	1
FQ857865	FQ857865	_PIRI_CONTIG_0677;	Finished	1
FQ857866	FQ857866	_PIRI_CONTIG_0678;	Finished	1
FQ857867	FQ857867	_PIRI_CONTIG_0679;	Finished	1
FQ857868	FQ857868	_PIRI_CONTIG_0680;	Finished	1
FQ857869	FQ857869	_PIRI_CONTIG_0681;	Finished	1
FQ859079	FQ859079	_PIRI_CONTIG_0682;	Finished	1
FQ857871	FQ857871	_PIRI_CONTIG_0683;	Finished	1
FQ857872	FQ857872	_PIRI_CONTIG_0684;	Finished	1
FQ857873	FQ857873	_PIRI_CONTIG_0685;	Finished	1
FQ857874	FQ857874	_PIRI_CONTIG_0686;	Finished	1
FQ857875	FQ857875	_PIRI_CONTIG_0687;	Finished	1
FQ857876	FQ857876	_PIRI_CONTIG_0688;	Finished	1
FQ857877	FQ857877	_PIRI_CONTIG_0689;	Finished	1
FQ857878	FQ857878	_PIRI_CONTIG_0690;	Finished	1
FQ857879	FQ857879	_PIRI_CONTIG_0691;	Finished	1
FQ857880	FQ857880	_PIRI_CONTIG_0692;	Finished	1
FQ857881	FQ857881	_PIRI_CONTIG_0693;	Finished	1
FQ857882	FQ857882	_PIRI_CONTIG_0694;	Finished	1
FQ857883	FQ857883	_PIRI_CONTIG_0695;	Finished	1
FQ857884	FQ857884	_PIRI_CONTIG_0696;	Finished	1
FQ857885	FQ857885	_PIRI_CONTIG_0697;	Finished	1
FQ857886	FQ857886	_PIRI_CONTIG_0698;	Finished	1
FQ857887	FQ857887	_PIRI_CONTIG_0699;	Finished	1
FQ857888	FQ857888	_PIRI_CONTIG_0700;	Finished	1
FQ857889	FQ857889	_PIRI_CONTIG_0701;	Finished	1
FQ857890	FQ857890	_PIRI_CONTIG_0702;	Finished	1
FQ857891	FQ857891	_PIRI_CONTIG_0703;	Finished	1
FQ857892	FQ857892	_PIRI_CONTIG_0704;	Finished	1
FQ857893	FQ857893	_PIRI_CONTIG_0705;	Finished	1
FQ857894	FQ857894	_PIRI_CONTIG_0706;	Finished	1
FQ857895	FQ857895	_PIRI_CONTIG_0707;	Finished	1
FQ857896	FQ857896	_PIRI_CONTIG_0708;	Finished	1
FQ857897	FQ857897	_PIRI_CONTIG_0709;	Finished	1
FQ857898	FQ857898	_PIRI_CONTIG_0710;	Finished	1
FQ857899	FQ857899	_PIRI_CONTIG_0711;	Finished	1
FQ857900	FQ857900	_PIRI_CONTIG_0712;	Finished	1
FQ857901	FQ857901	_PIRI_CONTIG_0713;	Finished	1
FQ857902	FQ857902	_PIRI_CONTIG_0714;	Finished	1
FQ857903	FQ857903	_PIRI_CONTIG_0715;	Finished	1
FQ857904	FQ857904	_PIRI_CONTIG_0716;	Finished	1
FQ857905	FQ857905	_PIRI_CONTIG_0717;	Finished	1
FQ857906	FQ857906	_PIRI_CONTIG_0718;	Finished	1
FQ857907	FQ857907	_PIRI_CONTIG_0719;	Finished	1
FQ857908	FQ857908	_PIRI_CONTIG_0720;	Finished	1
FQ857909	FQ857909	_PIRI_CONTIG_0721;	Finished	1
FQ857910	FQ857910	_PIRI_CONTIG_0722;	Finished	1
FQ857911	FQ857911	_PIRI_CONTIG_0723;	Finished	1
FQ857912	FQ857912	_PIRI_CONTIG_0724;	Finished	1
FQ857913	FQ857913	_PIRI_CONTIG_0725;	Finished	1
FQ857914	FQ857914	_PIRI_CONTIG_0726;	Finished	1
FQ857915	FQ857915	_PIRI_CONTIG_0727;	Finished	1
FQ857916	FQ857916	_PIRI_CONTIG_0728;	Finished	1
FQ857917	FQ857917	_PIRI_CONTIG_0729;	Finished	1
FQ857918	FQ857918	_PIRI_CONTIG_0730;	Finished	1
FQ857919	FQ857919	_PIRI_CONTIG_0731;	Finished	1
FQ857920	FQ857920	_PIRI_CONTIG_0732;	Finished	1
FQ857921	FQ857921	_PIRI_CONTIG_0733;	Finished	1
FQ857922	FQ857922	_PIRI_CONTIG_0734;	Finished	1
FQ857923	FQ857923	_PIRI_CONTIG_0735;	Finished	1
FQ857924	FQ857924	_PIRI_CONTIG_0736;	Finished	1
FQ857925	FQ857925	_PIRI_CONTIG_0737;	Finished	1
FQ857926	FQ857926	_PIRI_CONTIG_0738;	Finished	1
FQ857927	FQ857927	_PIRI_CONTIG_0739;	Finished	1
FQ857928	FQ857928	_PIRI_CONTIG_0740;	Finished	1
FQ857929	FQ857929	_PIRI_CONTIG_0741;	Finished	1
FQ857930	FQ857930	_PIRI_CONTIG_0742;	Finished	1
FQ857931	FQ857931	_PIRI_CONTIG_0743;	Finished	1
FQ857932	FQ857932	_PIRI_CONTIG_0744;	Finished	1
FQ857933	FQ857933	_PIRI_CONTIG_0745;	Finished	1
FQ857934	FQ857934	_PIRI_CONTIG_0746;	Finished	1
FQ857935	FQ857935	_PIRI_CONTIG_0747;	Finished	1
FQ857936	FQ857936	_PIRI_CONTIG_0748;	Finished	1
FQ857937	FQ857937	_PIRI_CONTIG_0749;	Finished	1
FQ857938	FQ857938	_PIRI_CONTIG_0750;	Finished	1
FQ857939	FQ857939	_PIRI_CONTIG_0751;	Finished	1
FQ857940	FQ857940	_PIRI_CONTIG_0752;	Finished	1
FQ857941	FQ857941	_PIRI_CONTIG_0753;	Finished	1
FQ857942	FQ857942	_PIRI_CONTIG_0754;	Finished	1
FQ857943	FQ857943	_PIRI_CONTIG_0755;	Finished	1
FQ857944	FQ857944	_PIRI_CONTIG_0756;	Finished	1
FQ857945	FQ857945	_PIRI_CONTIG_0757;	Finished	1
FQ857946	FQ857946	_PIRI_CONTIG_0758;	Finished	1
FQ857947	FQ857947	_PIRI_CONTIG_0759;	Finished	1
FQ857948	FQ857948	_PIRI_CONTIG_0760;	Finished	1
FQ857949	FQ857949	_PIRI_CONTIG_0761;	Finished	1
FQ857950	FQ857950	_PIRI_CONTIG_0762;	Finished	1
FQ857951	FQ857951	_PIRI_CONTIG_0763;	Finished	1
FQ857952	FQ857952	_PIRI_CONTIG_0764;	Finished	1
FQ857953	FQ857953	_PIRI_CONTIG_0765;	Finished	1
FQ857954	FQ857954	_PIRI_CONTIG_0766;	Finished	1
FQ857955	FQ857955	_PIRI_CONTIG_0767;	Finished	1
FQ857956	FQ857956	_PIRI_CONTIG_0768;	Finished	1
FQ857957	FQ857957	_PIRI_CONTIG_0769;	Finished	1
FQ857958	FQ857958	_PIRI_CONTIG_0770;	Finished	1
FQ857959	FQ857959	_PIRI_CONTIG_0771;	Finished	1
FQ857960	FQ857960	_PIRI_CONTIG_0772;	Finished	1
FQ857961	FQ857961	_PIRI_CONTIG_0773;	Finished	1
FQ857962	FQ857962	_PIRI_CONTIG_0774;	Finished	1
FQ857963	FQ857963	_PIRI_CONTIG_0775;	Finished	1
FQ857964	FQ857964	_PIRI_CONTIG_0776;	Finished	1
FQ857965	FQ857965	_PIRI_CONTIG_0777;	Finished	1
FQ857966	FQ857966	_PIRI_CONTIG_0778;	Finished	1
FQ857967	FQ857967	_PIRI_CONTIG_0779;	Finished	1
FQ857968	FQ857968	_PIRI_CONTIG_0780;	Finished	1
FQ857969	FQ857969	_PIRI_CONTIG_0781;	Finished	1
FQ857970	FQ857970	_PIRI_CONTIG_0782;	Finished	1
FQ857971	FQ857971	_PIRI_CONTIG_0783;	Finished	1
FQ857972	FQ857972	_PIRI_CONTIG_0784;	Finished	1
FQ857973	FQ857973	_PIRI_CONTIG_0785;	Finished	1
FQ857974	FQ857974	_PIRI_CONTIG_0786;	Finished	1
FQ857975	FQ857975	_PIRI_CONTIG_0787;	Finished	1
FQ857976	FQ857976	_PIRI_CONTIG_0788;	Finished	1
FQ857977	FQ857977	_PIRI_CONTIG_0789;	Finished	1
FQ857978	FQ857978	_PIRI_CONTIG_0790;	Finished	1
FQ857979	FQ857979	_PIRI_CONTIG_0791;	Finished	1
FQ857980	FQ857980	_PIRI_CONTIG_0792;	Finished	1
FQ857981	FQ857981	_PIRI_CONTIG_0793;	Finished	1
FQ857982	FQ857982	_PIRI_CONTIG_0794;	Finished	1
FQ857983	FQ857983	_PIRI_CONTIG_0795;	Finished	1
FQ857984	FQ857984	_PIRI_CONTIG_0796;	Finished	1
FQ857985	FQ857985	_PIRI_CONTIG_0797;	Finished	1
FQ857986	FQ857986	_PIRI_CONTIG_0798;	Finished	1
FQ857987	FQ857987	_PIRI_CONTIG_0799;	Finished	1
FQ857988	FQ857988	_PIRI_CONTIG_0800;	Finished	1
FQ857989	FQ857989	_PIRI_CONTIG_0801;	Finished	1
FQ857990	FQ857990	_PIRI_CONTIG_0802;	Finished	1
FQ857991	FQ857991	_PIRI_CONTIG_0803;	Finished	1
FQ857992	FQ857992	_PIRI_CONTIG_0804;	Finished	1
FQ857993	FQ857993	_PIRI_CONTIG_0805;	Finished	1
FQ857994	FQ857994	_PIRI_CONTIG_0806;	Finished	1
FQ857995	FQ857995	_PIRI_CONTIG_0807;	Finished	1
FQ857996	FQ857996	_PIRI_CONTIG_0808;	Finished	1
FQ857997	FQ857997	_PIRI_CONTIG_0809;	Finished	1
FQ857998	FQ857998	_PIRI_CONTIG_0810;	Finished	1
FQ857999	FQ857999	_PIRI_CONTIG_0811;	Finished	1
FQ858000	FQ858000	_PIRI_CONTIG_0812;	Finished	1
FQ858001	FQ858001	_PIRI_CONTIG_0813;	Finished	1
FQ858002	FQ858002	_PIRI_CONTIG_0814;	Finished	1
FQ858003	FQ858003	_PIRI_CONTIG_0815;	Finished	1
FQ858004	FQ858004	_PIRI_CONTIG_0816;	Finished	1
FQ858005	FQ858005	_PIRI_CONTIG_0817;	Finished	1
FQ858006	FQ858006	_PIRI_CONTIG_0818;	Finished	1
FQ858007	FQ858007	_PIRI_CONTIG_0819;	Finished	1
FQ858008	FQ858008	_PIRI_CONTIG_0820;	Finished	1
FQ858009	FQ858009	_PIRI_CONTIG_0821;	Finished	1
FQ858010	FQ858010	_PIRI_CONTIG_0822;	Finished	1
FQ858011	FQ858011	_PIRI_CONTIG_0823;	Finished	1
FQ858012	FQ858012	_PIRI_CONTIG_0824;	Finished	1
FQ858013	FQ858013	_PIRI_CONTIG_0825;	Finished	1
FQ858014	FQ858014	_PIRI_CONTIG_0826;	Finished	1
FQ858015	FQ858015	_PIRI_CONTIG_0827;	Finished	1
FQ858016	FQ858016	_PIRI_CONTIG_0828;	Finished	1
FQ858017	FQ858017	_PIRI_CONTIG_0829;	Finished	1
FQ858018	FQ858018	_PIRI_CONTIG_0830;	Finished	1
FQ858019	FQ858019	_PIRI_CONTIG_0831;	Finished	1
FQ858020	FQ858020	_PIRI_CONTIG_0832;	Finished	1
FQ858021	FQ858021	_PIRI_CONTIG_0833;	Finished	1
FQ858022	FQ858022	_PIRI_CONTIG_0834;	Finished	1
FQ858023	FQ858023	_PIRI_CONTIG_0835;	Finished	1
FQ858024	FQ858024	_PIRI_CONTIG_0836;	Finished	1
FQ858025	FQ858025	_PIRI_CONTIG_0837;	Finished	1
FQ858026	FQ858026	_PIRI_CONTIG_0838;	Finished	1
FQ859075	FQ859075	_PIRI_CONTIG_0839;	Finished	1
FQ858028	FQ858028	_PIRI_CONTIG_0840;	Finished	1
FQ858029	FQ858029	_PIRI_CONTIG_0841;	Finished	1
FQ858030	FQ858030	_PIRI_CONTIG_0842;	Finished	1
FQ858031	FQ858031	_PIRI_CONTIG_0843;	Finished	1
FQ858032	FQ858032	_PIRI_CONTIG_0844;	Finished	1
FQ858033	FQ858033	_PIRI_CONTIG_0845;	Finished	1
FQ858034	FQ858034	_PIRI_CONTIG_0846;	Finished	1
FQ858035	FQ858035	_PIRI_CONTIG_0847;	Finished	1
FQ858036	FQ858036	_PIRI_CONTIG_0848;	Finished	1
FQ858037	FQ858037	_PIRI_CONTIG_0849;	Finished	1
FQ858038	FQ858038	_PIRI_CONTIG_0850;	Finished	1
FQ858039	FQ858039	_PIRI_CONTIG_0851;	Finished	1
FQ858040	FQ858040	_PIRI_CONTIG_0852;	Finished	1
FQ858041	FQ858041	_PIRI_CONTIG_0853;	Finished	1
FQ858042	FQ858042	_PIRI_CONTIG_0854;	Finished	1
FQ858043	FQ858043	_PIRI_CONTIG_0855;	Finished	1
FQ858044	FQ858044	_PIRI_CONTIG_0856;	Finished	1
FQ858045	FQ858045	_PIRI_CONTIG_0857;	Finished	1
FQ858046	FQ858046	_PIRI_CONTIG_0858;	Finished	1
FQ858047	FQ858047	_PIRI_CONTIG_0859;	Finished	1
FQ858048	FQ858048	_PIRI_CONTIG_0860;	Finished	1
FQ858049	FQ858049	_PIRI_CONTIG_0861;	Finished	1
FQ858050	FQ858050	_PIRI_CONTIG_0862;	Finished	1
FQ858051	FQ858051	_PIRI_CONTIG_0863;	Finished	1
FQ858052	FQ858052	_PIRI_CONTIG_0864;	Finished	1
FQ858053	FQ858053	_PIRI_CONTIG_0865;	Finished	1
FQ858054	FQ858054	_PIRI_CONTIG_0866;	Finished	1
FQ858055	FQ858055	_PIRI_CONTIG_0867;	Finished	1
FQ858056	FQ858056	_PIRI_CONTIG_0868;	Finished	1
FQ858057	FQ858057	_PIRI_CONTIG_0869;	Finished	1
FQ858058	FQ858058	_PIRI_CONTIG_0870;	Finished	1
FQ858059	FQ858059	_PIRI_CONTIG_0871;	Finished	1
FQ858060	FQ858060	_PIRI_CONTIG_0872;	Finished	1
FQ858061	FQ858061	_PIRI_CONTIG_0873;	Finished	1
FQ858062	FQ858062	_PIRI_CONTIG_0874;	Finished	1
FQ858063	FQ858063	_PIRI_CONTIG_0875;	Finished	1
FQ858064	FQ858064	_PIRI_CONTIG_0876;	Finished	1
FQ858065	FQ858065	_PIRI_CONTIG_0877;	Finished	1
FQ858066	FQ858066	_PIRI_CONTIG_0878;	Finished	1
FQ858067	FQ858067	_PIRI_CONTIG_0879;	Finished	1
FQ858068	FQ858068	_PIRI_CONTIG_0880;	Finished	1
FQ858069	FQ858069	_PIRI_CONTIG_0881;	Finished	1
FQ858070	FQ858070	_PIRI_CONTIG_0882;	Finished	1
FQ858071	FQ858071	_PIRI_CONTIG_0883;	Finished	1
FQ858072	FQ858072	_PIRI_CONTIG_0884;	Finished	1
FQ858073	FQ858073	_PIRI_CONTIG_0885;	Finished	1
FQ858074	FQ858074	_PIRI_CONTIG_0886;	Finished	1
FQ858075	FQ858075	_PIRI_CONTIG_0887;	Finished	1
FQ858076	FQ858076	_PIRI_CONTIG_0888;	Finished	1
FQ858077	FQ858077	_PIRI_CONTIG_0889;	Finished	1
FQ858078	FQ858078	_PIRI_CONTIG_0890;	Finished	1
FQ858079	FQ858079	_PIRI_CONTIG_0891;	Finished	1
FQ858080	FQ858080	_PIRI_CONTIG_0892;	Finished	1
FQ858081	FQ858081	_PIRI_CONTIG_0893;	Finished	1
FQ858082	FQ858082	_PIRI_CONTIG_0894;	Finished	1
FQ858083	FQ858083	_PIRI_CONTIG_0895;	Finished	1
FQ858084	FQ858084	_PIRI_CONTIG_0896;	Finished	1
FQ858085	FQ858085	_PIRI_CONTIG_0897;	Finished	1
FQ858086	FQ858086	_PIRI_CONTIG_0898;	Finished	1
FQ858087	FQ858087	_PIRI_CONTIG_0899;	Finished	1
FQ858088	FQ858088	_PIRI_CONTIG_0900;	Finished	1
FQ858089	FQ858089	_PIRI_CONTIG_0901;	Finished	1
FQ858090	FQ858090	_PIRI_CONTIG_0902;	Finished	1
FQ858091	FQ858091	_PIRI_CONTIG_0903;	Finished	1
FQ858092	FQ858092	_PIRI_CONTIG_0904;	Finished	1
FQ858093	FQ858093	_PIRI_CONTIG_0905;	Finished	1
FQ858094	FQ858094	_PIRI_CONTIG_0906;	Finished	1
FQ858095	FQ858095	_PIRI_CONTIG_0907;	Finished	1
FQ858096	FQ858096	_PIRI_CONTIG_0908;	Finished	1
FQ858097	FQ858097	_PIRI_CONTIG_0909;	Finished	1
FQ858098	FQ858098	_PIRI_CONTIG_0910;	Finished	1
FQ858099	FQ858099	_PIRI_CONTIG_0911;	Finished	1
FQ858100	FQ858100	_PIRI_CONTIG_0912;	Finished	1
FQ858101	FQ858101	_PIRI_CONTIG_0913;	Finished	1
FQ858102	FQ858102	_PIRI_CONTIG_0914;	Finished	1
FQ858103	FQ858103	_PIRI_CONTIG_0915;	Finished	1
FQ858104	FQ858104	_PIRI_CONTIG_0916;	Finished	1
FQ858105	FQ858105	_PIRI_CONTIG_0917;	Finished	1
FQ858106	FQ858106	_PIRI_CONTIG_0918;	Finished	1
FQ858107	FQ858107	_PIRI_CONTIG_0919;	Finished	1
FQ858108	FQ858108	_PIRI_CONTIG_0920;	Finished	1
FQ858109	FQ858109	_PIRI_CONTIG_0921;	Finished	1
FQ858110	FQ858110	_PIRI_CONTIG_0922;	Finished	1
FQ858111	FQ858111	_PIRI_CONTIG_0923;	Finished	1
FQ858112	FQ858112	_PIRI_CONTIG_0924;	Finished	1
FQ858113	FQ858113	_PIRI_CONTIG_0925;	Finished	1
FQ858114	FQ858114	_PIRI_CONTIG_0926;	Finished	1
FQ858115	FQ858115	_PIRI_CONTIG_0927;	Finished	1
FQ858116	FQ858116	_PIRI_CONTIG_0928;	Finished	1
FQ858117	FQ858117	_PIRI_CONTIG_0929;	Finished	1
FQ858118	FQ858118	_PIRI_CONTIG_0930;	Finished	1
FQ858119	FQ858119	_PIRI_CONTIG_0931;	Finished	1
FQ858120	FQ858120	_PIRI_CONTIG_0932;	Finished	1
FQ858121	FQ858121	_PIRI_CONTIG_0933;	Finished	1
FQ858122	FQ858122	_PIRI_CONTIG_0934;	Finished	1
FQ858123	FQ858123	_PIRI_CONTIG_0935;	Finished	1
FQ858124	FQ858124	_PIRI_CONTIG_0936;	Finished	1
FQ858125	FQ858125	_PIRI_CONTIG_0937;	Finished	1
FQ858126	FQ858126	_PIRI_CONTIG_0938;	Finished	1
FQ858127	FQ858127	_PIRI_CONTIG_0939;	Finished	1
FQ858128	FQ858128	_PIRI_CONTIG_0940;	Finished	1
FQ858129	FQ858129	_PIRI_CONTIG_0941;	Finished	1
FQ858130	FQ858130	_PIRI_CONTIG_0942;	Finished	1
FQ858131	FQ858131	_PIRI_CONTIG_0943;	Finished	1
FQ858132	FQ858132	_PIRI_CONTIG_0944;	Finished	1
FQ858133	FQ858133	_PIRI_CONTIG_0945;	Finished	1
FQ858134	FQ858134	_PIRI_CONTIG_0946;	Finished	1
FQ858135	FQ858135	_PIRI_CONTIG_0947;	Finished	1
FQ858136	FQ858136	_PIRI_CONTIG_0948;	Finished	1
FQ858137	FQ858137	_PIRI_CONTIG_0949;	Finished	1
FQ858138	FQ858138	_PIRI_CONTIG_0950;	Finished	1
FQ858139	FQ858139	_PIRI_CONTIG_0951;	Finished	1
FQ858140	FQ858140	_PIRI_CONTIG_0952;	Finished	1
FQ858141	FQ858141	_PIRI_CONTIG_0953;	Finished	1
FQ858142	FQ858142	_PIRI_CONTIG_0954;	Finished	1
FQ858143	FQ858143	_PIRI_CONTIG_0955;	Finished	1
FQ858144	FQ858144	_PIRI_CONTIG_0956;	Finished	1
FQ858145	FQ858145	_PIRI_CONTIG_0957;	Finished	1
FQ858146	FQ858146	_PIRI_CONTIG_0958;	Finished	1
FQ858147	FQ858147	_PIRI_CONTIG_0959;	Finished	1
FQ858148	FQ858148	_PIRI_CONTIG_0960;	Finished	1
FQ858149	FQ858149	_PIRI_CONTIG_0961;	Finished	1
FQ858150	FQ858150	_PIRI_CONTIG_0962;	Finished	1
FQ858151	FQ858151	_PIRI_CONTIG_0963;	Finished	1
FQ858152	FQ858152	_PIRI_CONTIG_0964;	Finished	1
FQ858153	FQ858153	_PIRI_CONTIG_0965;	Finished	1
FQ858154	FQ858154	_PIRI_CONTIG_0966;	Finished	1
FQ858155	FQ858155	_PIRI_CONTIG_0967;	Finished	1
FQ858156	FQ858156	_PIRI_CONTIG_0968;	Finished	1
FQ858157	FQ858157	_PIRI_CONTIG_0969;	Finished	1
FQ858158	FQ858158	_PIRI_CONTIG_0970;	Finished	1
FQ858159	FQ858159	_PIRI_CONTIG_0971;	Finished	1
FQ858160	FQ858160	_PIRI_CONTIG_0972;	Finished	1
FQ858161	FQ858161	_PIRI_CONTIG_0973;	Finished	1
FQ858162	FQ858162	_PIRI_CONTIG_0974;	Finished	1
FQ858163	FQ858163	_PIRI_CONTIG_0975;	Finished	1
FQ858164	FQ858164	_PIRI_CONTIG_0976;	Finished	1
FQ858165	FQ858165	_PIRI_CONTIG_0977;	Finished	1
FQ858166	FQ858166	_PIRI_CONTIG_0978;	Finished	1
FQ858167	FQ858167	_PIRI_CONTIG_0979;	Finished	1
FQ858168	FQ858168	_PIRI_CONTIG_0980;	Finished	1
FQ858169	FQ858169	_PIRI_CONTIG_0981;	Finished	1
FQ858170	FQ858170	_PIRI_CONTIG_0982;	Finished	1
FQ858171	FQ858171	_PIRI_CONTIG_0983;	Finished	1
FQ858172	FQ858172	_PIRI_CONTIG_0984;	Finished	1
FQ858173	FQ858173	_PIRI_CONTIG_0985;	Finished	1
FQ858174	FQ858174	_PIRI_CONTIG_0986;	Finished	1
FQ858175	FQ858175	_PIRI_CONTIG_0987;	Finished	1
FQ858176	FQ858176	_PIRI_CONTIG_0988;	Finished	1
FQ858177	FQ858177	_PIRI_CONTIG_0989;	Finished	1
FQ858178	FQ858178	_PIRI_CONTIG_0990;	Finished	1
FQ858179	FQ858179	_PIRI_CONTIG_0991;	Finished	1
FQ858180	FQ858180	_PIRI_CONTIG_0992;	Finished	1
FQ858181	FQ858181	_PIRI_CONTIG_0993;	Finished	1
FQ858182	FQ858182	_PIRI_CONTIG_0994;	Finished	1
FQ858183	FQ858183	_PIRI_CONTIG_0995;	Finished	1
FQ858184	FQ858184	_PIRI_CONTIG_0996;	Finished	1
FQ858185	FQ858185	_PIRI_CONTIG_0997;	Finished	1
FQ858186	FQ858186	_PIRI_CONTIG_0998;	Finished	1
FQ858187	FQ858187	_PIRI_CONTIG_0999;	Finished	1
FQ858188	FQ858188	_PIRI_CONTIG_1000;	Finished	1
FQ858189	FQ858189	_PIRI_CONTIG_1001;	Finished	1
FQ858190	FQ858190	_PIRI_CONTIG_1002;	Finished	1
FQ858191	FQ858191	_PIRI_CONTIG_1003;	Finished	1
FQ858192	FQ858192	_PIRI_CONTIG_1004;	Finished	1
FQ858193	FQ858193	_PIRI_CONTIG_1005;	Finished	1
FQ858194	FQ858194	_PIRI_CONTIG_1006;	Finished	1
FQ858195	FQ858195	_PIRI_CONTIG_1007;	Finished	1
FQ858196	FQ858196	_PIRI_CONTIG_1008;	Finished	1
FQ858197	FQ858197	_PIRI_CONTIG_1009;	Finished	1
FQ858198	FQ858198	_PIRI_CONTIG_1010;	Finished	1
FQ858199	FQ858199	_PIRI_CONTIG_1011;	Finished	1
FQ858200	FQ858200	_PIRI_CONTIG_1012;	Finished	1
FQ858201	FQ858201	_PIRI_CONTIG_1013;	Finished	1
FQ858202	FQ858202	_PIRI_CONTIG_1014;	Finished	1
FQ858203	FQ858203	_PIRI_CONTIG_1015;	Finished	1
FQ858204	FQ858204	_PIRI_CONTIG_1016;	Finished	1
FQ858205	FQ858205	_PIRI_CONTIG_1017;	Finished	1
FQ858206	FQ858206	_PIRI_CONTIG_1018;	Finished	1
FQ858207	FQ858207	_PIRI_CONTIG_1019;	Finished	1
FQ858208	FQ858208	_PIRI_CONTIG_1020;	Finished	1
FQ858209	FQ858209	_PIRI_CONTIG_1021;	Finished	1
FQ858210	FQ858210	_PIRI_CONTIG_1022;	Finished	1
FQ858211	FQ858211	_PIRI_CONTIG_1023;	Finished	1
FQ858212	FQ858212	_PIRI_CONTIG_1024;	Finished	1
FQ858213	FQ858213	_PIRI_CONTIG_1025;	Finished	1
FQ858214	FQ858214	_PIRI_CONTIG_1026;	Finished	1
FQ858215	FQ858215	_PIRI_CONTIG_1027;	Finished	1
FQ858216	FQ858216	_PIRI_CONTIG_1028;	Finished	1
FQ858217	FQ858217	_PIRI_CONTIG_1029;	Finished	1
FQ858218	FQ858218	_PIRI_CONTIG_1030;	Finished	1
FQ858219	FQ858219	_PIRI_CONTIG_1031;	Finished	1
FQ858220	FQ858220	_PIRI_CONTIG_1032;	Finished	1
FQ858221	FQ858221	_PIRI_CONTIG_1033;	Finished	1
FQ858222	FQ858222	_PIRI_CONTIG_1034;	Finished	1
FQ858223	FQ858223	_PIRI_CONTIG_1035;	Finished	1
FQ858224	FQ858224	_PIRI_CONTIG_1036;	Finished	1
FQ858225	FQ858225	_PIRI_CONTIG_1037;	Finished	1
FQ858226	FQ858226	_PIRI_CONTIG_1038;	Finished	1
FQ858227	FQ858227	_PIRI_CONTIG_1039;	Finished	1
FQ858228	FQ858228	_PIRI_CONTIG_1040;	Finished	1
FQ858229	FQ858229	_PIRI_CONTIG_1041;	Finished	1
FQ858230	FQ858230	_PIRI_CONTIG_1042;	Finished	1
FQ858231	FQ858231	_PIRI_CONTIG_1043;	Finished	1
FQ858232	FQ858232	_PIRI_CONTIG_1044;	Finished	1
FQ858233	FQ858233	_PIRI_CONTIG_1045;	Finished	1
FQ858234	FQ858234	_PIRI_CONTIG_1046;	Finished	1
FQ858235	FQ858235	_PIRI_CONTIG_1047;	Finished	1
FQ858236	FQ858236	_PIRI_CONTIG_1048;	Finished	1
FQ858237	FQ858237	_PIRI_CONTIG_1049;	Finished	1
FQ858238	FQ858238	_PIRI_CONTIG_1050;	Finished	1
FQ858239	FQ858239	_PIRI_CONTIG_1051;	Finished	1
FQ858240	FQ858240	_PIRI_CONTIG_1052;	Finished	1
FQ858241	FQ858241	_PIRI_CONTIG_1053;	Finished	1
FQ858242	FQ858242	_PIRI_CONTIG_1054;	Finished	1
FQ858243	FQ858243	_PIRI_CONTIG_1055;	Finished	1
FQ858244	FQ858244	_PIRI_CONTIG_1056;	Finished	1
FQ858245	FQ858245	_PIRI_CONTIG_1057;	Finished	1
FQ858246	FQ858246	_PIRI_CONTIG_1058;	Finished	1
FQ858247	FQ858247	_PIRI_CONTIG_1059;	Finished	1
FQ858248	FQ858248	_PIRI_CONTIG_1060;	Finished	1
FQ858249	FQ858249	_PIRI_CONTIG_1061;	Finished	1
FQ858250	FQ858250	_PIRI_CONTIG_1062;	Finished	1
FQ858251	FQ858251	_PIRI_CONTIG_1063;	Finished	1
FQ858252	FQ858252	_PIRI_CONTIG_1064;	Finished	1
FQ858253	FQ858253	_PIRI_CONTIG_1065;	Finished	1
FQ858254	FQ858254	_PIRI_CONTIG_1066;	Finished	1
FQ858255	FQ858255	_PIRI_CONTIG_1067;	Finished	1
FQ858256	FQ858256	_PIRI_CONTIG_1068;	Finished	1
FQ858257	FQ858257	_PIRI_CONTIG_1069;	Finished	1
FQ858258	FQ858258	_PIRI_CONTIG_1070;	Finished	1
FQ858259	FQ858259	_PIRI_CONTIG_1071;	Finished	1
FQ858260	FQ858260	_PIRI_CONTIG_1072;	Finished	1
FQ858261	FQ858261	_PIRI_CONTIG_1073;	Finished	1
FQ858262	FQ858262	_PIRI_CONTIG_1074;	Finished	1
FQ858263	FQ858263	_PIRI_CONTIG_1075;	Finished	1
FQ858264	FQ858264	_PIRI_CONTIG_1076;	Finished	1
FQ858265	FQ858265	_PIRI_CONTIG_1077;	Finished	1
FQ858266	FQ858266	_PIRI_CONTIG_1078;	Finished	1
FQ858267	FQ858267	_PIRI_CONTIG_1079;	Finished	1
FQ858268	FQ858268	_PIRI_CONTIG_1080;	Finished	1
FQ858269	FQ858269	_PIRI_CONTIG_1081;	Finished	1
FQ858270	FQ858270	_PIRI_CONTIG_1082;	Finished	1
FQ858271	FQ858271	_PIRI_CONTIG_1083;	Finished	1
FQ858272	FQ858272	_PIRI_CONTIG_1084;	Finished	1
FQ858273	FQ858273	_PIRI_CONTIG_1085;	Finished	1
FQ858274	FQ858274	_PIRI_CONTIG_1086;	Finished	1
FQ858275	FQ858275	_PIRI_CONTIG_1087;	Finished	1
FQ858276	FQ858276	_PIRI_CONTIG_1088;	Finished	1
FQ858277	FQ858277	_PIRI_CONTIG_1089;	Finished	1
FQ858278	FQ858278	_PIRI_CONTIG_1090;	Finished	1
FQ859070	FQ859070	_PIRI_CONTIG_1091;	Finished	1
FQ858279	FQ858279	_PIRI_CONTIG_1092;	Finished	1
FQ858280	FQ858280	_PIRI_CONTIG_1093;	Finished	1
FQ858281	FQ858281	_PIRI_CONTIG_1094;	Finished	1
FQ858282	FQ858282	_PIRI_CONTIG_1095;	Finished	1
FQ858283	FQ858283	_PIRI_CONTIG_1096;	Finished	1
FQ858284	FQ858284	_PIRI_CONTIG_1097;	Finished	1
FQ858285	FQ858285	_PIRI_CONTIG_1098;	Finished	1
FQ858286	FQ858286	_PIRI_CONTIG_1099;	Finished	1
FQ858287	FQ858287	_PIRI_CONTIG_1100;	Finished	1
FQ858288	FQ858288	_PIRI_CONTIG_1101;	Finished	1
FQ858289	FQ858289	_PIRI_CONTIG_1102;	Finished	1
FQ858290	FQ858290	_PIRI_CONTIG_1103;	Finished	1
FQ858291	FQ858291	_PIRI_CONTIG_1104;	Finished	1
FQ858292	FQ858292	_PIRI_CONTIG_1105;	Finished	1
FQ858293	FQ858293	_PIRI_CONTIG_1106;	Finished	1
FQ858294	FQ858294	_PIRI_CONTIG_1107;	Finished	1
FQ858295	FQ858295	_PIRI_CONTIG_1108;	Finished	1
FQ858296	FQ858296	_PIRI_CONTIG_1109;	Finished	1
FQ858297	FQ858297	_PIRI_CONTIG_1110;	Finished	1
FQ858298	FQ858298	_PIRI_CONTIG_1111;	Finished	1
FQ858299	FQ858299	_PIRI_CONTIG_1112;	Finished	1
FQ858300	FQ858300	_PIRI_CONTIG_1113;	Finished	1
FQ858301	FQ858301	_PIRI_CONTIG_1114;	Finished	1
FQ858302	FQ858302	_PIRI_CONTIG_1115;	Finished	1
FQ858303	FQ858303	_PIRI_CONTIG_1116;	Finished	1
FQ858304	FQ858304	_PIRI_CONTIG_1117;	Finished	1
FQ858305	FQ858305	_PIRI_CONTIG_1118;	Finished	1
FQ858306	FQ858306	_PIRI_CONTIG_1119;	Finished	1
FQ858307	FQ858307	_PIRI_CONTIG_1120;	Finished	1
FQ858308	FQ858308	_PIRI_CONTIG_1121;	Finished	1
FQ858309	FQ858309	_PIRI_CONTIG_1122;	Finished	1
FQ858310	FQ858310	_PIRI_CONTIG_1123;	Finished	1
FQ858311	FQ858311	_PIRI_CONTIG_1124;	Finished	1
FQ858312	FQ858312	_PIRI_CONTIG_1125;	Finished	1
FQ858313	FQ858313	_PIRI_CONTIG_1126;	Finished	1
FQ858314	FQ858314	_PIRI_CONTIG_1127;	Finished	1
FQ858315	FQ858315	_PIRI_CONTIG_1128;	Finished	1
FQ858316	FQ858316	_PIRI_CONTIG_1129;	Finished	1
FQ858317	FQ858317	_PIRI_CONTIG_1130;	Finished	1
FQ858318	FQ858318	_PIRI_CONTIG_1131;	Finished	1
FQ858319	FQ858319	_PIRI_CONTIG_1132;	Finished	1
FQ858320	FQ858320	_PIRI_CONTIG_1133;	Finished	1
FQ858321	FQ858321	_PIRI_CONTIG_1134;	Finished	1
FQ858322	FQ858322	_PIRI_CONTIG_1135;	Finished	1
FQ858323	FQ858323	_PIRI_CONTIG_1136;	Finished	1
FQ858324	FQ858324	_PIRI_CONTIG_1137;	Finished	1
FQ858325	FQ858325	_PIRI_CONTIG_1138;	Finished	1
FQ858326	FQ858326	_PIRI_CONTIG_1139;	Finished	1
FQ858327	FQ858327	_PIRI_CONTIG_1140;	Finished	1
FQ858328	FQ858328	_PIRI_CONTIG_1141;	Finished	1
FQ858329	FQ858329	_PIRI_CONTIG_1142;	Finished	1
FQ858330	FQ858330	_PIRI_CONTIG_1143;	Finished	1
FQ858331	FQ858331	_PIRI_CONTIG_1144;	Finished	1
FQ858332	FQ858332	_PIRI_CONTIG_1145;	Finished	1
FQ858333	FQ858333	_PIRI_CONTIG_1146;	Finished	1
FQ858334	FQ858334	_PIRI_CONTIG_1147;	Finished	1
FQ858335	FQ858335	_PIRI_CONTIG_1148;	Finished	1
FQ858336	FQ858336	_PIRI_CONTIG_1149;	Finished	1
FQ858337	FQ858337	_PIRI_CONTIG_1150;	Finished	1
FQ858338	FQ858338	_PIRI_CONTIG_1151;	Finished	1
FQ858339	FQ858339	_PIRI_CONTIG_1152;	Finished	1
FQ858340	FQ858340	_PIRI_CONTIG_1153;	Finished	1
FQ858341	FQ858341	_PIRI_CONTIG_1154;	Finished	1
FQ858342	FQ858342	_PIRI_CONTIG_1155;	Finished	1
FQ858343	FQ858343	_PIRI_CONTIG_1156;	Finished	1
FQ858344	FQ858344	_PIRI_CONTIG_1157;	Finished	1
FQ858345	FQ858345	_PIRI_CONTIG_1158;	Finished	1
FQ858346	FQ858346	_PIRI_CONTIG_1159;	Finished	1
FQ858347	FQ858347	_PIRI_CONTIG_1160;	Finished	1
FQ858348	FQ858348	_PIRI_CONTIG_1161;	Finished	1
FQ858349	FQ858349	_PIRI_CONTIG_1162;	Finished	1
FQ858350	FQ858350	_PIRI_CONTIG_1163;	Finished	1
FQ858351	FQ858351	_PIRI_CONTIG_1164;	Finished	1
FQ858352	FQ858352	_PIRI_CONTIG_1165;	Finished	1
FQ858353	FQ858353	_PIRI_CONTIG_1166;	Finished	1
FQ858354	FQ858354	_PIRI_CONTIG_1167;	Finished	1
FQ858355	FQ858355	_PIRI_CONTIG_1168;	Finished	1
FQ858356	FQ858356	_PIRI_CONTIG_1169;	Finished	1
FQ858357	FQ858357	_PIRI_CONTIG_1170;	Finished	1
FQ858358	FQ858358	_PIRI_CONTIG_1171;	Finished	1
FQ858359	FQ858359	_PIRI_CONTIG_1172;	Finished	1
FQ858360	FQ858360	_PIRI_CONTIG_1173;	Finished	1
FQ858361	FQ858361	_PIRI_CONTIG_1174;	Finished	1
FQ858362	FQ858362	_PIRI_CONTIG_1175;	Finished	1
FQ859088	FQ859088	_PIRI_CONTIG_1176;	Finished	1
FQ858363	FQ858363	_PIRI_CONTIG_1177;	Finished	1
FQ858364	FQ858364	_PIRI_CONTIG_1178;	Finished	1
FQ858365	FQ858365	_PIRI_CONTIG_1179;	Finished	1
FQ858366	FQ858366	_PIRI_CONTIG_1180;	Finished	1
FQ858367	FQ858367	_PIRI_CONTIG_1181;	Finished	1
FQ858368	FQ858368	_PIRI_CONTIG_1182;	Finished	1
FQ858369	FQ858369	_PIRI_CONTIG_1183;	Finished	1
FQ858370	FQ858370	_PIRI_CONTIG_1184;	Finished	1
FQ858371	FQ858371	_PIRI_CONTIG_1185;	Finished	1
FQ858372	FQ858372	_PIRI_CONTIG_1186;	Finished	1
FQ858373	FQ858373	_PIRI_CONTIG_1187;	Finished	1
FQ858374	FQ858374	_PIRI_CONTIG_1188;	Finished	1
FQ858375	FQ858375	_PIRI_CONTIG_1189;	Finished	1
FQ858376	FQ858376	_PIRI_CONTIG_1190;	Finished	1
FQ858377	FQ858377	_PIRI_CONTIG_1191;	Finished	1
FQ858378	FQ858378	_PIRI_CONTIG_1192;	Finished	1
FQ858379	FQ858379	_PIRI_CONTIG_1193;	Finished	1
FQ858380	FQ858380	_PIRI_CONTIG_1194;	Finished	1
FQ858381	FQ858381	_PIRI_CONTIG_1195;	Finished	1
FQ858382	FQ858382	_PIRI_CONTIG_1196;	Finished	1
FQ858383	FQ858383	_PIRI_CONTIG_1197;	Finished	1
FQ858384	FQ858384	_PIRI_CONTIG_1198;	Finished	1
FQ858385	FQ858385	_PIRI_CONTIG_1199;	Finished	1
FQ858386	FQ858386	_PIRI_CONTIG_1200;	Finished	1
FQ858387	FQ858387	_PIRI_CONTIG_1201;	Finished	1
FQ858388	FQ858388	_PIRI_CONTIG_1202;	Finished	1
FQ858389	FQ858389	_PIRI_CONTIG_1203;	Finished	1
FQ858390	FQ858390	_PIRI_CONTIG_1204;	Finished	1
FQ858391	FQ858391	_PIRI_CONTIG_1205;	Finished	1
FQ858392	FQ858392	_PIRI_CONTIG_1206;	Finished	1
FQ858393	FQ858393	_PIRI_CONTIG_1207;	Finished	1
FQ858394	FQ858394	_PIRI_CONTIG_1208;	Finished	1
FQ858395	FQ858395	_PIRI_CONTIG_1209;	Finished	1
FQ858396	FQ858396	_PIRI_CONTIG_1210;	Finished	1
FQ858397	FQ858397	_PIRI_CONTIG_1211;	Finished	1
FQ858398	FQ858398	_PIRI_CONTIG_1212;	Finished	1
FQ858399	FQ858399	_PIRI_CONTIG_1213;	Finished	1
FQ858400	FQ858400	_PIRI_CONTIG_1214;	Finished	1
FQ858401	FQ858401	_PIRI_CONTIG_1215;	Finished	1
FQ858402	FQ858402	_PIRI_CONTIG_1216;	Finished	1
FQ858403	FQ858403	_PIRI_CONTIG_1217;	Finished	1
FQ858404	FQ858404	_PIRI_CONTIG_1218;	Finished	1
FQ858405	FQ858405	_PIRI_CONTIG_1219;	Finished	1
FQ858406	FQ858406	_PIRI_CONTIG_1220;	Finished	1
FQ858407	FQ858407	_PIRI_CONTIG_1221;	Finished	1
FQ858408	FQ858408	_PIRI_CONTIG_1222;	Finished	1
FQ858409	FQ858409	_PIRI_CONTIG_1223;	Finished	1
FQ858410	FQ858410	_PIRI_CONTIG_1224;	Finished	1
FQ858411	FQ858411	_PIRI_CONTIG_1225;	Finished	1
FQ858412	FQ858412	_PIRI_CONTIG_1226;	Finished	1
FQ858413	FQ858413	_PIRI_CONTIG_1227;	Finished	1
FQ858414	FQ858414	_PIRI_CONTIG_1228;	Finished	1
FQ858415	FQ858415	_PIRI_CONTIG_1229;	Finished	1
FQ858416	FQ858416	_PIRI_CONTIG_1230;	Finished	1
FQ858417	FQ858417	_PIRI_CONTIG_1231;	Finished	1
FQ858418	FQ858418	_PIRI_CONTIG_1232;	Finished	1
FQ858419	FQ858419	_PIRI_CONTIG_1233;	Finished	1
FQ858420	FQ858420	_PIRI_CONTIG_1234;	Finished	1
FQ858421	FQ858421	_PIRI_CONTIG_1235;	Finished	1
FQ858422	FQ858422	_PIRI_CONTIG_1236;	Finished	1
FQ858423	FQ858423	_PIRI_CONTIG_1237;	Finished	1
FQ858424	FQ858424	_PIRI_CONTIG_1238;	Finished	1
FQ858425	FQ858425	_PIRI_CONTIG_1239;	Finished	1
FQ858426	FQ858426	_PIRI_CONTIG_1240;	Finished	1
FQ858427	FQ858427	_PIRI_CONTIG_1241;	Finished	1
FQ858428	FQ858428	_PIRI_CONTIG_1242;	Finished	1
FQ858429	FQ858429	_PIRI_CONTIG_1243;	Finished	1
FQ858430	FQ858430	_PIRI_CONTIG_1244;	Finished	1
FQ858431	FQ858431	_PIRI_CONTIG_1245;	Finished	1
FQ858432	FQ858432	_PIRI_CONTIG_1246;	Finished	1
FQ858433	FQ858433	_PIRI_CONTIG_1247;	Finished	1
FQ858434	FQ858434	_PIRI_CONTIG_1248;	Finished	1
FQ858435	FQ858435	_PIRI_CONTIG_1249;	Finished	1
FQ858436	FQ858436	_PIRI_CONTIG_1250;	Finished	1
FQ858437	FQ858437	_PIRI_CONTIG_1251;	Finished	1
FQ858438	FQ858438	_PIRI_CONTIG_1252;	Finished	1
FQ858439	FQ858439	_PIRI_CONTIG_1253;	Finished	1
FQ858440	FQ858440	_PIRI_CONTIG_1254;	Finished	1
FQ858441	FQ858441	_PIRI_CONTIG_1255;	Finished	1
FQ858442	FQ858442	_PIRI_CONTIG_1256;	Finished	1
FQ858443	FQ858443	_PIRI_CONTIG_1257;	Finished	1
FQ858444	FQ858444	_PIRI_CONTIG_1258;	Finished	1
FQ858445	FQ858445	_PIRI_CONTIG_1259;	Finished	1
FQ858446	FQ858446	_PIRI_CONTIG_1260;	Finished	1
FQ858447	FQ858447	_PIRI_CONTIG_1261;	Finished	1
FQ858448	FQ858448	_PIRI_CONTIG_1262;	Finished	1
FQ858449	FQ858449	_PIRI_CONTIG_1263;	Finished	1
FQ858450	FQ858450	_PIRI_CONTIG_1264;	Finished	1
FQ858451	FQ858451	_PIRI_CONTIG_1265;	Finished	1
FQ858452	FQ858452	_PIRI_CONTIG_1266;	Finished	1
FQ858453	FQ858453	_PIRI_CONTIG_1267;	Finished	1
FQ858454	FQ858454	_PIRI_CONTIG_1268;	Finished	1
FQ858455	FQ858455	_PIRI_CONTIG_1269;	Finished	1
FQ858456	FQ858456	_PIRI_CONTIG_1270;	Finished	1
FQ858457	FQ858457	_PIRI_CONTIG_1271;	Finished	1
FQ858458	FQ858458	_PIRI_CONTIG_1272;	Finished	1
FQ858459	FQ858459	_PIRI_CONTIG_1273;	Finished	1
FQ858460	FQ858460	_PIRI_CONTIG_1274;	Finished	1
FQ858461	FQ858461	_PIRI_CONTIG_1275;	Finished	1
FQ858462	FQ858462	_PIRI_CONTIG_1276;	Finished	1
FQ858463	FQ858463	_PIRI_CONTIG_1277;	Finished	1
FQ858464	FQ858464	_PIRI_CONTIG_1278;	Finished	1
FQ858465	FQ858465	_PIRI_CONTIG_1279;	Finished	1
FQ858466	FQ858466	_PIRI_CONTIG_1280;	Finished	1
FQ858467	FQ858467	_PIRI_CONTIG_1281;	Finished	1
FQ858468	FQ858468	_PIRI_CONTIG_1282;	Finished	1
FQ858469	FQ858469	_PIRI_CONTIG_1283;	Finished	1
FQ858470	FQ858470	_PIRI_CONTIG_1284;	Finished	1
FQ858471	FQ858471	_PIRI_CONTIG_1285;	Finished	1
FQ858472	FQ858472	_PIRI_CONTIG_1286;	Finished	1
FQ858473	FQ858473	_PIRI_CONTIG_1287;	Finished	1
FQ858474	FQ858474	_PIRI_CONTIG_1288;	Finished	1
FQ858475	FQ858475	_PIRI_CONTIG_1289;	Finished	1
FQ858476	FQ858476	_PIRI_CONTIG_1290;	Finished	1
FQ858477	FQ858477	_PIRI_CONTIG_1291;	Finished	1
FQ858478	FQ858478	_PIRI_CONTIG_1292;	Finished	1
FQ858479	FQ858479	_PIRI_CONTIG_1293;	Finished	1
FQ858480	FQ858480	_PIRI_CONTIG_1294;	Finished	1
FQ858481	FQ858481	_PIRI_CONTIG_1295;	Finished	1
FQ858482	FQ858482	_PIRI_CONTIG_1296;	Finished	1
FQ858483	FQ858483	_PIRI_CONTIG_1297;	Finished	1
FQ858484	FQ858484	_PIRI_CONTIG_1298;	Finished	1
FQ858485	FQ858485	_PIRI_CONTIG_1299;	Finished	1
FQ858486	FQ858486	_PIRI_CONTIG_1300;	Finished	1
FQ858487	FQ858487	_PIRI_CONTIG_1301;	Finished	1
FQ858488	FQ858488	_PIRI_CONTIG_1302;	Finished	1
FQ858489	FQ858489	_PIRI_CONTIG_1303;	Finished	1
FQ858490	FQ858490	_PIRI_CONTIG_1304;	Finished	1
FQ858491	FQ858491	_PIRI_CONTIG_1305;	Finished	1
FQ858492	FQ858492	_PIRI_CONTIG_1306;	Finished	1
FQ858493	FQ858493	_PIRI_CONTIG_1307;	Finished	1
FQ858494	FQ858494	_PIRI_CONTIG_1308;	Finished	1
FQ858495	FQ858495	_PIRI_CONTIG_1309;	Finished	1
FQ858496	FQ858496	_PIRI_CONTIG_1310;	Finished	1
FQ858497	FQ858497	_PIRI_CONTIG_1311;	Finished	1
FQ858498	FQ858498	_PIRI_CONTIG_1312;	Finished	1
FQ858499	FQ858499	_PIRI_CONTIG_1313;	Finished	1
FQ858500	FQ858500	_PIRI_CONTIG_1314;	Finished	1
FQ858501	FQ858501	_PIRI_CONTIG_1315;	Finished	1
FQ858502	FQ858502	_PIRI_CONTIG_1316;	Finished	1
FQ858503	FQ858503	_PIRI_CONTIG_1317;	Finished	1
FQ858504	FQ858504	_PIRI_CONTIG_1318;	Finished	1
FQ858505	FQ858505	_PIRI_CONTIG_1319;	Finished	1
FQ858506	FQ858506	_PIRI_CONTIG_1320;	Finished	1
FQ858507	FQ858507	_PIRI_CONTIG_1321;	Finished	1
FQ858508	FQ858508	_PIRI_CONTIG_1322;	Finished	1
FQ858509	FQ858509	_PIRI_CONTIG_1323;	Finished	1
FQ858510	FQ858510	_PIRI_CONTIG_1324;	Finished	1
FQ858511	FQ858511	_PIRI_CONTIG_1325;	Finished	1
FQ858512	FQ858512	_PIRI_CONTIG_1326;	Finished	1
FQ858513	FQ858513	_PIRI_CONTIG_1327;	Finished	1
FQ858514	FQ858514	_PIRI_CONTIG_1328;	Finished	1
FQ858515	FQ858515	_PIRI_CONTIG_1329;	Finished	1
FQ858516	FQ858516	_PIRI_CONTIG_1330;	Finished	1
FQ858517	FQ858517	_PIRI_CONTIG_1331;	Finished	1
FQ858518	FQ858518	_PIRI_CONTIG_1332;	Finished	1
FQ858519	FQ858519	_PIRI_CONTIG_1333;	Finished	1
FQ858520	FQ858520	_PIRI_CONTIG_1334;	Finished	1
FQ858521	FQ858521	_PIRI_CONTIG_1335;	Finished	1
FQ858522	FQ858522	_PIRI_CONTIG_1336;	Finished	1
FQ858523	FQ858523	_PIRI_CONTIG_1337;	Finished	1
FQ858524	FQ858524	_PIRI_CONTIG_1338;	Finished	1
FQ858525	FQ858525	_PIRI_CONTIG_1339;	Finished	1
FQ858526	FQ858526	_PIRI_CONTIG_1340;	Finished	1
FQ858527	FQ858527	_PIRI_CONTIG_1341;	Finished	1
FQ858528	FQ858528	_PIRI_CONTIG_1342;	Finished	1
FQ858529	FQ858529	_PIRI_CONTIG_1343;	Finished	1
FQ858530	FQ858530	_PIRI_CONTIG_1344;	Finished	1
FQ858531	FQ858531	_PIRI_CONTIG_1345;	Finished	1
FQ858532	FQ858532	_PIRI_CONTIG_1346;	Finished	1
FQ858533	FQ858533	_PIRI_CONTIG_1347;	Finished	1
FQ858534	FQ858534	_PIRI_CONTIG_1348;	Finished	1
FQ858535	FQ858535	_PIRI_CONTIG_1349;	Finished	1
FQ858536	FQ858536	_PIRI_CONTIG_1350;	Finished	1
FQ858537	FQ858537	_PIRI_CONTIG_1351;	Finished	1
FQ858538	FQ858538	_PIRI_CONTIG_1352;	Finished	1
FQ858539	FQ858539	_PIRI_CONTIG_1353;	Finished	1
FQ858540	FQ858540	_PIRI_CONTIG_1354;	Finished	1
FQ858541	FQ858541	_PIRI_CONTIG_1355;	Finished	1
FQ858542	FQ858542	_PIRI_CONTIG_1356;	Finished	1
FQ858543	FQ858543	_PIRI_CONTIG_1357;	Finished	1
FQ858544	FQ858544	_PIRI_CONTIG_1358;	Finished	1
FQ858545	FQ858545	_PIRI_CONTIG_1359;	Finished	1
FQ858546	FQ858546	_PIRI_CONTIG_1360;	Finished	1
FQ858547	FQ858547	_PIRI_CONTIG_1361;	Finished	1
FQ858548	FQ858548	_PIRI_CONTIG_1362;	Finished	1
FQ858549	FQ858549	_PIRI_CONTIG_1363;	Finished	1
FQ858550	FQ858550	_PIRI_CONTIG_1364;	Finished	1
FQ858551	FQ858551	_PIRI_CONTIG_1365;	Finished	1
FQ858552	FQ858552	_PIRI_CONTIG_1366;	Finished	1
FQ858553	FQ858553	_PIRI_CONTIG_1367;	Finished	1
FQ858554	FQ858554	_PIRI_CONTIG_1368;	Finished	1
FQ858555	FQ858555	_PIRI_CONTIG_1369;	Finished	1
FQ858556	FQ858556	_PIRI_CONTIG_1370;	Finished	1
FQ858557	FQ858557	_PIRI_CONTIG_1371;	Finished	1
FQ858558	FQ858558	_PIRI_CONTIG_1372;	Finished	1
FQ858559	FQ858559	_PIRI_CONTIG_1373;	Finished	1
FQ858560	FQ858560	_PIRI_CONTIG_1374;	Finished	1
FQ858561	FQ858561	_PIRI_CONTIG_1375;	Finished	1
FQ858562	FQ858562	_PIRI_CONTIG_1376;	Finished	1
FQ858563	FQ858563	_PIRI_CONTIG_1377;	Finished	1
FQ858564	FQ858564	_PIRI_CONTIG_1378;	Finished	1
FQ858565	FQ858565	_PIRI_CONTIG_1379;	Finished	1
FQ858566	FQ858566	_PIRI_CONTIG_1380;	Finished	1
FQ858567	FQ858567	_PIRI_CONTIG_1381;	Finished	1
FQ858568	FQ858568	_PIRI_CONTIG_1382;	Finished	1
FQ858569	FQ858569	_PIRI_CONTIG_1383;	Finished	1
FQ858570	FQ858570	_PIRI_CONTIG_1384;	Finished	1
FQ858571	FQ858571	_PIRI_CONTIG_1385;	Finished	1
FQ858572	FQ858572	_PIRI_CONTIG_1386;	Finished	1
FQ858573	FQ858573	_PIRI_CONTIG_1387;	Finished	1
FQ858574	FQ858574	_PIRI_CONTIG_1388;	Finished	1
FQ858575	FQ858575	_PIRI_CONTIG_1389;	Finished	1
FQ858576	FQ858576	_PIRI_CONTIG_1390;	Finished	1
FQ858577	FQ858577	_PIRI_CONTIG_1391;	Finished	1
FQ858578	FQ858578	_PIRI_CONTIG_1392;	Finished	1
FQ858579	FQ858579	_PIRI_CONTIG_1393;	Finished	1
FQ858580	FQ858580	_PIRI_CONTIG_1394;	Finished	1
FQ858581	FQ858581	_PIRI_CONTIG_1395;	Finished	1
FQ858582	FQ858582	_PIRI_CONTIG_1396;	Finished	1
FQ858583	FQ858583	_PIRI_CONTIG_1397;	Finished	1
FQ858584	FQ858584	_PIRI_CONTIG_1398;	Finished	1
FQ858585	FQ858585	_PIRI_CONTIG_1399;	Finished	1
FQ858586	FQ858586	_PIRI_CONTIG_1400;	Finished	1
FQ858587	FQ858587	_PIRI_CONTIG_1401;	Finished	1
FQ859069	FQ859069	_PIRI_CONTIG_1402;	Finished	1
FQ858589	FQ858589	_PIRI_CONTIG_1403;	Finished	1
FQ858590	FQ858590	_PIRI_CONTIG_1404;	Finished	1
FQ858591	FQ858591	_PIRI_CONTIG_1405;	Finished	1
FQ858592	FQ858592	_PIRI_CONTIG_1406;	Finished	1
FQ858593	FQ858593	_PIRI_CONTIG_1407;	Finished	1
FQ858594	FQ858594	_PIRI_CONTIG_1408;	Finished	1
FQ858595	FQ858595	_PIRI_CONTIG_1409;	Finished	1
FQ858596	FQ858596	_PIRI_CONTIG_1410;	Finished	1
FQ858597	FQ858597	_PIRI_CONTIG_1411;	Finished	1
FQ858598	FQ858598	_PIRI_CONTIG_1412;	Finished	1
FQ858599	FQ858599	_PIRI_CONTIG_1413;	Finished	1
FQ858600	FQ858600	_PIRI_CONTIG_1414;	Finished	1
FQ858601	FQ858601	_PIRI_CONTIG_1415;	Finished	1
FQ858602	FQ858602	_PIRI_CONTIG_1416;	Finished	1
FQ858603	FQ858603	_PIRI_CONTIG_1417;	Finished	1
FQ858604	FQ858604	_PIRI_CONTIG_1418;	Finished	1
FQ858605	FQ858605	_PIRI_CONTIG_1419;	Finished	1
FQ858606	FQ858606	_PIRI_CONTIG_1420;	Finished	1
FQ858607	FQ858607	_PIRI_CONTIG_1421;	Finished	1
FQ858608	FQ858608	_PIRI_CONTIG_1422;	Finished	1
FQ858609	FQ858609	_PIRI_CONTIG_1423;	Finished	1
FQ858610	FQ858610	_PIRI_CONTIG_1424;	Finished	1
FQ858611	FQ858611	_PIRI_CONTIG_1425;	Finished	1
FQ858612	FQ858612	_PIRI_CONTIG_1426;	Finished	1
FQ858613	FQ858613	_PIRI_CONTIG_1427;	Finished	1
FQ858614	FQ858614	_PIRI_CONTIG_1428;	Finished	1
FQ858615	FQ858615	_PIRI_CONTIG_1429;	Finished	1
FQ858616	FQ858616	_PIRI_CONTIG_1430;	Finished	1
FQ858617	FQ858617	_PIRI_CONTIG_1431;	Finished	1
FQ858618	FQ858618	_PIRI_CONTIG_1432;	Finished	1
FQ858619	FQ858619	_PIRI_CONTIG_1433;	Finished	1
FQ858620	FQ858620	_PIRI_CONTIG_1434;	Finished	1
FQ858621	FQ858621	_PIRI_CONTIG_1435;	Finished	1
FQ858622	FQ858622	_PIRI_CONTIG_1436;	Finished	1
FQ858623	FQ858623	_PIRI_CONTIG_1437;	Finished	1
FQ858624	FQ858624	_PIRI_CONTIG_1438;	Finished	1
FQ858625	FQ858625	_PIRI_CONTIG_1439;	Finished	1
FQ858626	FQ858626	_PIRI_CONTIG_1440;	Finished	1
FQ858627	FQ858627	_PIRI_CONTIG_1441;	Finished	1
FQ858628	FQ858628	_PIRI_CONTIG_1442;	Finished	1
FQ858629	FQ858629	_PIRI_CONTIG_1443;	Finished	1
FQ858630	FQ858630	_PIRI_CONTIG_1444;	Finished	1
FQ858631	FQ858631	_PIRI_CONTIG_1445;	Finished	1
FQ858632	FQ858632	_PIRI_CONTIG_1446;	Finished	1
FQ858633	FQ858633	_PIRI_CONTIG_1447;	Finished	1
FQ858634	FQ858634	_PIRI_CONTIG_1448;	Finished	1
FQ858635	FQ858635	_PIRI_CONTIG_1449;	Finished	1
FQ858636	FQ858636	_PIRI_CONTIG_1450;	Finished	1
FQ858637	FQ858637	_PIRI_CONTIG_1451;	Finished	1
FQ858638	FQ858638	_PIRI_CONTIG_1452;	Finished	1
FQ858639	FQ858639	_PIRI_CONTIG_1453;	Finished	1
FQ858640	FQ858640	_PIRI_CONTIG_1454;	Finished	1
FQ858641	FQ858641	_PIRI_CONTIG_1455;	Finished	1
FQ858642	FQ858642	_PIRI_CONTIG_1456;	Finished	1
FQ858643	FQ858643	_PIRI_CONTIG_1457;	Finished	1
FQ858644	FQ858644	_PIRI_CONTIG_1458;	Finished	1
FQ858645	FQ858645	_PIRI_CONTIG_1459;	Finished	1
FQ858646	FQ858646	_PIRI_CONTIG_1460;	Finished	1
FQ858647	FQ858647	_PIRI_CONTIG_1461;	Finished	1
FQ858648	FQ858648	_PIRI_CONTIG_1462;	Finished	1
FQ858649	FQ858649	_PIRI_CONTIG_1463;	Finished	1
FQ858650	FQ858650	_PIRI_CONTIG_1464;	Finished	1
FQ858651	FQ858651	_PIRI_CONTIG_1465;	Finished	1
FQ858652	FQ858652	_PIRI_CONTIG_1466;	Finished	1
FQ858653	FQ858653	_PIRI_CONTIG_1467;	Finished	1
FQ858654	FQ858654	_PIRI_CONTIG_1468;	Finished	1
FQ858655	FQ858655	_PIRI_CONTIG_1469;	Finished	1
FQ858656	FQ858656	_PIRI_CONTIG_1470;	Finished	1
FQ858657	FQ858657	_PIRI_CONTIG_1471;	Finished	1
FQ858658	FQ858658	_PIRI_CONTIG_1472;	Finished	1
FQ858659	FQ858659	_PIRI_CONTIG_1473;	Finished	1
FQ858660	FQ858660	_PIRI_CONTIG_1474;	Finished	1
FQ858661	FQ858661	_PIRI_CONTIG_1475;	Finished	1
FQ858662	FQ858662	_PIRI_CONTIG_1476;	Finished	1
FQ858663	FQ858663	_PIRI_CONTIG_1477;	Finished	1
FQ858664	FQ858664	_PIRI_CONTIG_1478;	Finished	1
FQ858665	FQ858665	_PIRI_CONTIG_1479;	Finished	1
FQ858666	FQ858666	_PIRI_CONTIG_1480;	Finished	1
FQ858667	FQ858667	_PIRI_CONTIG_1481;	Finished	1
FQ858668	FQ858668	_PIRI_CONTIG_1482;	Finished	1
FQ858669	FQ858669	_PIRI_CONTIG_1483;	Finished	1
FQ858670	FQ858670	_PIRI_CONTIG_1484;	Finished	1
FQ858671	FQ858671	_PIRI_CONTIG_1485;	Finished	1
FQ858672	FQ858672	_PIRI_CONTIG_1486;	Finished	1
FQ858673	FQ858673	_PIRI_CONTIG_1487;	Finished	1
FQ858674	FQ858674	_PIRI_CONTIG_1488;	Finished	1
FQ858675	FQ858675	_PIRI_CONTIG_1489;	Finished	1
FQ858676	FQ858676	_PIRI_CONTIG_1490;	Finished	1
FQ858677	FQ858677	_PIRI_CONTIG_1491;	Finished	1
FQ858678	FQ858678	_PIRI_CONTIG_1492;	Finished	1
FQ858679	FQ858679	_PIRI_CONTIG_1493;	Finished	1
FQ858680	FQ858680	_PIRI_CONTIG_1494;	Finished	1
FQ858681	FQ858681	_PIRI_CONTIG_1495;	Finished	1
FQ858682	FQ858682	_PIRI_CONTIG_1496;	Finished	1
FQ858683	FQ858683	_PIRI_CONTIG_1497;	Finished	1
FQ858684	FQ858684	_PIRI_CONTIG_1498;	Finished	1
FQ858685	FQ858685	_PIRI_CONTIG_1499;	Finished	1
FQ858686	FQ858686	_PIRI_CONTIG_1500;	Finished	1
FQ858687	FQ858687	_PIRI_CONTIG_1501;	Finished	1
FQ858688	FQ858688	_PIRI_CONTIG_1502;	Finished	1
FQ858689	FQ858689	_PIRI_CONTIG_1503;	Finished	1
FQ858690	FQ858690	_PIRI_CONTIG_1504;	Finished	1
FQ858691	FQ858691	_PIRI_CONTIG_1505;	Finished	1
FQ858692	FQ858692	_PIRI_CONTIG_1506;	Finished	1
FQ858693	FQ858693	_PIRI_CONTIG_1507;	Finished	1
FQ858694	FQ858694	_PIRI_CONTIG_1508;	Finished	1
FQ858695	FQ858695	_PIRI_CONTIG_1509;	Finished	1
FQ858696	FQ858696	_PIRI_CONTIG_1510;	Finished	1
FQ858697	FQ858697	_PIRI_CONTIG_1511;	Finished	1
FQ858698	FQ858698	_PIRI_CONTIG_1512;	Finished	1
FQ858699	FQ858699	_PIRI_CONTIG_1513;	Finished	1
FQ858700	FQ858700	_PIRI_CONTIG_1514;	Finished	1
FQ858701	FQ858701	_PIRI_CONTIG_1515;	Finished	1
FQ858702	FQ858702	_PIRI_CONTIG_1516;	Finished	1
FQ858703	FQ858703	_PIRI_CONTIG_1517;	Finished	1
FQ858704	FQ858704	_PIRI_CONTIG_1518;	Finished	1
FQ858705	FQ858705	_PIRI_CONTIG_1519;	Finished	1
FQ858706	FQ858706	_PIRI_CONTIG_1520;	Finished	1
FQ858707	FQ858707	_PIRI_CONTIG_1521;	Finished	1
FQ858708	FQ858708	_PIRI_CONTIG_1522;	Finished	1
FQ858709	FQ858709	_PIRI_CONTIG_1523;	Finished	1
FQ858710	FQ858710	_PIRI_CONTIG_1524;	Finished	1
FQ858711	FQ858711	_PIRI_CONTIG_1525;	Finished	1
FQ858712	FQ858712	_PIRI_CONTIG_1526;	Finished	1
FQ858713	FQ858713	_PIRI_CONTIG_1527;	Finished	1
FQ858714	FQ858714	_PIRI_CONTIG_1528;	Finished	1
FQ858715	FQ858715	_PIRI_CONTIG_1529;	Finished	1
FQ858716	FQ858716	_PIRI_CONTIG_1530;	Finished	1
FQ859085	FQ859085	_PIRI_CONTIG_1531;	Finished	1
FQ858717	FQ858717	_PIRI_CONTIG_1532;	Finished	1
FQ858718	FQ858718	_PIRI_CONTIG_1533;	Finished	1
FQ858719	FQ858719	_PIRI_CONTIG_1534;	Finished	1
FQ858720	FQ858720	_PIRI_CONTIG_1535;	Finished	1
FQ858721	FQ858721	_PIRI_CONTIG_1536;	Finished	1
FQ858722	FQ858722	_PIRI_CONTIG_1537;	Finished	1
FQ858723	FQ858723	_PIRI_CONTIG_1538;	Finished	1
FQ858724	FQ858724	_PIRI_CONTIG_1539;	Finished	1
FQ858725	FQ858725	_PIRI_CONTIG_1540;	Finished	1
FQ858726	FQ858726	_PIRI_CONTIG_1541;	Finished	1
FQ858727	FQ858727	_PIRI_CONTIG_1542;	Finished	1
FQ858728	FQ858728	_PIRI_CONTIG_1543;	Finished	1
FQ858729	FQ858729	_PIRI_CONTIG_1544;	Finished	1
FQ858730	FQ858730	_PIRI_CONTIG_1545;	Finished	1
FQ858731	FQ858731	_PIRI_CONTIG_1546;	Finished	1
FQ858732	FQ858732	_PIRI_CONTIG_1547;	Finished	1
FQ858733	FQ858733	_PIRI_CONTIG_1548;	Finished	1
FQ858734	FQ858734	_PIRI_CONTIG_1549;	Finished	1
FQ858735	FQ858735	_PIRI_CONTIG_1550;	Finished	1
FQ858736	FQ858736	_PIRI_CONTIG_1551;	Finished	1
FQ858737	FQ858737	_PIRI_CONTIG_1552;	Finished	1
FQ858738	FQ858738	_PIRI_CONTIG_1553;	Finished	1
FQ858739	FQ858739	_PIRI_CONTIG_1554;	Finished	1
FQ858740	FQ858740	_PIRI_CONTIG_1555;	Finished	1
FQ858741	FQ858741	_PIRI_CONTIG_1556;	Finished	1
FQ858742	FQ858742	_PIRI_CONTIG_1557;	Finished	1
FQ858743	FQ858743	_PIRI_CONTIG_1558;	Finished	1
FQ858744	FQ858744	_PIRI_CONTIG_1559;	Finished	1
FQ858745	FQ858745	_PIRI_CONTIG_1560;	Finished	1
FQ858746	FQ858746	_PIRI_CONTIG_1561;	Finished	1
FQ858747	FQ858747	_PIRI_CONTIG_1562;	Finished	1
FQ858748	FQ858748	_PIRI_CONTIG_1563;	Finished	1
FQ858749	FQ858749	_PIRI_CONTIG_1564;	Finished	1
FQ858750	FQ858750	_PIRI_CONTIG_1565;	Finished	1
FQ858751	FQ858751	_PIRI_CONTIG_1566;	Finished	1
FQ858752	FQ858752	_PIRI_CONTIG_1567;	Finished	1
FQ858753	FQ858753	_PIRI_CONTIG_1568;	Finished	1
FQ858754	FQ858754	_PIRI_CONTIG_1569;	Finished	1
FQ858755	FQ858755	_PIRI_CONTIG_1570;	Finished	1
FQ858756	FQ858756	_PIRI_CONTIG_1571;	Finished	1
FQ858757	FQ858757	_PIRI_CONTIG_1572;	Finished	1
FQ858758	FQ858758	_PIRI_CONTIG_1573;	Finished	1
FQ858759	FQ858759	_PIRI_CONTIG_1574;	Finished	1
FQ858760	FQ858760	_PIRI_CONTIG_1575;	Finished	1
FQ858761	FQ858761	_PIRI_CONTIG_1576;	Finished	1
FQ858762	FQ858762	_PIRI_CONTIG_1577;	Finished	1
FQ858763	FQ858763	_PIRI_CONTIG_1578;	Finished	1
FQ858764	FQ858764	_PIRI_CONTIG_1579;	Finished	1
FQ858765	FQ858765	_PIRI_CONTIG_1580;	Finished	1
FQ858766	FQ858766	_PIRI_CONTIG_1581;	Finished	1
FQ858767	FQ858767	_PIRI_CONTIG_1582;	Finished	1
FQ858768	FQ858768	_PIRI_CONTIG_1583;	Finished	1
FQ858769	FQ858769	_PIRI_CONTIG_1584;	Finished	1
FQ858770	FQ858770	_PIRI_CONTIG_1585;	Finished	1
FQ858771	FQ858771	_PIRI_CONTIG_1586;	Finished	1
FQ858772	FQ858772	_PIRI_CONTIG_1587;	Finished	1
FQ858773	FQ858773	_PIRI_CONTIG_1588;	Finished	1
FQ858774	FQ858774	_PIRI_CONTIG_1589;	Finished	1
FQ858775	FQ858775	_PIRI_CONTIG_1590;	Finished	1
FQ858776	FQ858776	_PIRI_CONTIG_1591;	Finished	1
FQ858777	FQ858777	_PIRI_CONTIG_1592;	Finished	1
FQ858778	FQ858778	_PIRI_CONTIG_1593;	Finished	1
FQ858779	FQ858779	_PIRI_CONTIG_1594;	Finished	1
FQ858780	FQ858780	_PIRI_CONTIG_1595;	Finished	1
FQ858781	FQ858781	_PIRI_CONTIG_1596;	Finished	1
FQ858782	FQ858782	_PIRI_CONTIG_1597;	Finished	1
FQ858783	FQ858783	_PIRI_CONTIG_1598;	Finished	1
FQ858784	FQ858784	_PIRI_CONTIG_1599;	Finished	1
FQ858785	FQ858785	_PIRI_CONTIG_1600;	Finished	1
FQ858786	FQ858786	_PIRI_CONTIG_1601;	Finished	1
FQ858787	FQ858787	_PIRI_CONTIG_1602;	Finished	1
FQ858788	FQ858788	_PIRI_CONTIG_1603;	Finished	1
FQ858789	FQ858789	_PIRI_CONTIG_1604;	Finished	1
FQ858790	FQ858790	_PIRI_CONTIG_1605;	Finished	1
FQ858791	FQ858791	_PIRI_CONTIG_1606;	Finished	1
FQ858792	FQ858792	_PIRI_CONTIG_1607;	Finished	1
FQ858793	FQ858793	_PIRI_CONTIG_1608;	Finished	1
FQ858794	FQ858794	_PIRI_CONTIG_1609;	Finished	1
FQ858795	FQ858795	_PIRI_CONTIG_1610;	Finished	1
FQ858796	FQ858796	_PIRI_CONTIG_1611;	Finished	1
FQ858797	FQ858797	_PIRI_CONTIG_1612;	Finished	1
FQ858798	FQ858798	_PIRI_CONTIG_1613;	Finished	1
FQ858799	FQ858799	_PIRI_CONTIG_1614;	Finished	1
FQ858800	FQ858800	_PIRI_CONTIG_1615;	Finished	1
FQ858801	FQ858801	_PIRI_CONTIG_1616;	Finished	1
FQ858802	FQ858802	_PIRI_CONTIG_1617;	Finished	1
FQ858803	FQ858803	_PIRI_CONTIG_1618;	Finished	1
FQ858804	FQ858804	_PIRI_CONTIG_1619;	Finished	1
FQ858805	FQ858805	_PIRI_CONTIG_1620;	Finished	1
FQ858806	FQ858806	_PIRI_CONTIG_1621;	Finished	1
FQ858807	FQ858807	_PIRI_CONTIG_1622;	Finished	1
FQ858808	FQ858808	_PIRI_CONTIG_1623;	Finished	1
FQ858809	FQ858809	_PIRI_CONTIG_1624;	Finished	1
FQ858810	FQ858810	_PIRI_CONTIG_1625;	Finished	1
FQ858811	FQ858811	_PIRI_CONTIG_1626;	Finished	1
FQ858812	FQ858812	_PIRI_CONTIG_1627;	Finished	1
FQ858813	FQ858813	_PIRI_CONTIG_1628;	Finished	1
FQ858814	FQ858814	_PIRI_CONTIG_1629;	Finished	1
FQ858815	FQ858815	_PIRI_CONTIG_1630;	Finished	1
FQ858816	FQ858816	_PIRI_CONTIG_1631;	Finished	1
FQ858817	FQ858817	_PIRI_CONTIG_1632;	Finished	1
FQ858818	FQ858818	_PIRI_CONTIG_1633;	Finished	1
FQ858819	FQ858819	_PIRI_CONTIG_1634;	Finished	1
FQ858820	FQ858820	_PIRI_CONTIG_1635;	Finished	1
FQ858821	FQ858821	_PIRI_CONTIG_1636;	Finished	1
FQ858822	FQ858822	_PIRI_CONTIG_1637;	Finished	1
FQ858823	FQ858823	_PIRI_CONTIG_1638;	Finished	1
FQ858824	FQ858824	_PIRI_CONTIG_1639;	Finished	1
FQ858825	FQ858825	_PIRI_CONTIG_1640;	Finished	1
FQ858826	FQ858826	_PIRI_CONTIG_1641;	Finished	1
FQ858827	FQ858827	_PIRI_CONTIG_1642;	Finished	1
FQ858828	FQ858828	_PIRI_CONTIG_1643;	Finished	1
FQ858829	FQ858829	_PIRI_CONTIG_1644;	Finished	1
FQ858830	FQ858830	_PIRI_CONTIG_1645;	Finished	1
FQ858831	FQ858831	_PIRI_CONTIG_1646;	Finished	1
FQ858832	FQ858832	_PIRI_CONTIG_1647;	Finished	1
FQ858833	FQ858833	_PIRI_CONTIG_1648;	Finished	1
FQ858834	FQ858834	_PIRI_CONTIG_1649;	Finished	1
FQ858835	FQ858835	_PIRI_CONTIG_1650;	Finished	1
FQ858836	FQ858836	_PIRI_CONTIG_1651;	Finished	1
FQ858837	FQ858837	_PIRI_CONTIG_1652;	Finished	1
FQ858838	FQ858838	_PIRI_CONTIG_1653;	Finished	1
FQ858839	FQ858839	_PIRI_CONTIG_1654;	Finished	1
FQ858840	FQ858840	_PIRI_CONTIG_1655;	Finished	1
FQ858841	FQ858841	_PIRI_CONTIG_1656;	Finished	1
FQ858842	FQ858842	_PIRI_CONTIG_1657;	Finished	1
FQ858843	FQ858843	_PIRI_CONTIG_1658;	Finished	1
FQ858844	FQ858844	_PIRI_CONTIG_1659;	Finished	1
FQ858845	FQ858845	_PIRI_CONTIG_1660;	Finished	1
FQ858846	FQ858846	_PIRI_CONTIG_1661;	Finished	1
FQ858847	FQ858847	_PIRI_CONTIG_1662;	Finished	1
FQ858848	FQ858848	_PIRI_CONTIG_1663;	Finished	1
FQ858849	FQ858849	_PIRI_CONTIG_1664;	Finished	1
FQ858850	FQ858850	_PIRI_CONTIG_1665;	Finished	1
FQ858851	FQ858851	_PIRI_CONTIG_1666;	Finished	1
FQ858852	FQ858852	_PIRI_CONTIG_1667;	Finished	1
FQ858853	FQ858853	_PIRI_CONTIG_1668;	Finished	1
FQ858854	FQ858854	_PIRI_CONTIG_1669;	Finished	1
FQ858855	FQ858855	_PIRI_CONTIG_1670;	Finished	1
FQ858856	FQ858856	_PIRI_CONTIG_1671;	Finished	1
FQ858857	FQ858857	_PIRI_CONTIG_1672;	Finished	1
FQ858858	FQ858858	_PIRI_CONTIG_1673;	Finished	1
FQ858859	FQ858859	_PIRI_CONTIG_1674;	Finished	1
FQ858860	FQ858860	_PIRI_CONTIG_1675;	Finished	1
FQ858861	FQ858861	_PIRI_CONTIG_1676;	Finished	1
FQ858862	FQ858862	_PIRI_CONTIG_1677;	Finished	1
FQ858863	FQ858863	_PIRI_CONTIG_1678;	Finished	1
FQ858864	FQ858864	_PIRI_CONTIG_1679;	Finished	1
FQ858865	FQ858865	_PIRI_CONTIG_1680;	Finished	1
FQ858866	FQ858866	_PIRI_CONTIG_1681;	Finished	1
FQ858867	FQ858867	_PIRI_CONTIG_1682;	Finished	1
FQ858868	FQ858868	_PIRI_CONTIG_1683;	Finished	1
FQ858869	FQ858869	_PIRI_CONTIG_1684;	Finished	1
FQ858870	FQ858870	_PIRI_CONTIG_1685;	Finished	1
FQ858871	FQ858871	_PIRI_CONTIG_1686;	Finished	1
FQ858872	FQ858872	_PIRI_CONTIG_1687;	Finished	1
FQ858873	FQ858873	_PIRI_CONTIG_1688;	Finished	1
FQ858874	FQ858874	_PIRI_CONTIG_1689;	Finished	1
FQ858875	FQ858875	_PIRI_CONTIG_1690;	Finished	1
FQ858876	FQ858876	_PIRI_CONTIG_1691;	Finished	1
FQ858877	FQ858877	_PIRI_CONTIG_1692;	Finished	1
FQ858878	FQ858878	_PIRI_CONTIG_1693;	Finished	1
FQ858879	FQ858879	_PIRI_CONTIG_1694;	Finished	1
FQ858880	FQ858880	_PIRI_CONTIG_1695;	Finished	1
FQ858881	FQ858881	_PIRI_CONTIG_1696;	Finished	1
FQ858882	FQ858882	_PIRI_CONTIG_1697;	Finished	1
FQ858883	FQ858883	_PIRI_CONTIG_1698;	Finished	1
FQ858884	FQ858884	_PIRI_CONTIG_1699;	Finished	1
FQ858885	FQ858885	_PIRI_CONTIG_1700;	Finished	1
FQ858886	FQ858886	_PIRI_CONTIG_1701;	Finished	1
FQ858887	FQ858887	_PIRI_CONTIG_1702;	Finished	1
FQ858888	FQ858888	_PIRI_CONTIG_1703;	Finished	1
FQ858889	FQ858889	_PIRI_CONTIG_1704;	Finished	1
FQ858890	FQ858890	_PIRI_CONTIG_1705;	Finished	1
FQ858891	FQ858891	_PIRI_CONTIG_1706;	Finished	1
FQ858892	FQ858892	_PIRI_CONTIG_1707;	Finished	1
FQ858893	FQ858893	_PIRI_CONTIG_1708;	Finished	1
FQ858894	FQ858894	_PIRI_CONTIG_1709;	Finished	1
FQ858895	FQ858895	_PIRI_CONTIG_1710;	Finished	1
FQ858896	FQ858896	_PIRI_CONTIG_1711;	Finished	1
FQ858897	FQ858897	_PIRI_CONTIG_1712;	Finished	1
FQ858898	FQ858898	_PIRI_CONTIG_1713;	Finished	1
FQ858899	FQ858899	_PIRI_CONTIG_1714;	Finished	1
FQ858900	FQ858900	_PIRI_CONTIG_1715;	Finished	1
FQ858901	FQ858901	_PIRI_CONTIG_1716;	Finished	1
FQ858902	FQ858902	_PIRI_CONTIG_1717;	Finished	1
FQ858903	FQ858903	_PIRI_CONTIG_1718;	Finished	1
FQ858904	FQ858904	_PIRI_CONTIG_1719;	Finished	1
FQ858905	FQ858905	_PIRI_CONTIG_1720;	Finished	1
FQ858906	FQ858906	_PIRI_CONTIG_1721;	Finished	1
FQ858907	FQ858907	_PIRI_CONTIG_1722;	Finished	1
FQ858908	FQ858908	_PIRI_CONTIG_1723;	Finished	1
FQ858909	FQ858909	_PIRI_CONTIG_1724;	Finished	1
FQ858910	FQ858910	_PIRI_CONTIG_1725;	Finished	1
FQ858911	FQ858911	_PIRI_CONTIG_1726;	Finished	1
FQ858912	FQ858912	_PIRI_CONTIG_1727;	Finished	1
FQ858913	FQ858913	_PIRI_CONTIG_1728;	Finished	1
FQ858914	FQ858914	_PIRI_CONTIG_1729;	Finished	1
FQ858915	FQ858915	_PIRI_CONTIG_1730;	Finished	1
FQ858916	FQ858916	_PIRI_CONTIG_1731;	Finished	1
FQ858917	FQ858917	_PIRI_CONTIG_1732;	Finished	1
FQ858918	FQ858918	_PIRI_CONTIG_1733;	Finished	1
FQ858919	FQ858919	_PIRI_CONTIG_1734;	Finished	1
FQ858920	FQ858920	_PIRI_CONTIG_1735;	Finished	1
FQ858921	FQ858921	_PIRI_CONTIG_1736;	Finished	1
FQ858922	FQ858922	_PIRI_CONTIG_1737;	Finished	1
FQ858923	FQ858923	_PIRI_CONTIG_1738;	Finished	1
FQ858924	FQ858924	_PIRI_CONTIG_1739;	Finished	1
FQ858925	FQ858925	_PIRI_CONTIG_1740;	Finished	1
FQ858926	FQ858926	_PIRI_CONTIG_1741;	Finished	1
FQ858927	FQ858927	_PIRI_CONTIG_1742;	Finished	1
FQ858928	FQ858928	_PIRI_CONTIG_1743;	Finished	1
FQ858929	FQ858929	_PIRI_CONTIG_1744;	Finished	1
FQ858930	FQ858930	_PIRI_CONTIG_1745;	Finished	1
FQ858931	FQ858931	_PIRI_CONTIG_1746;	Finished	1
FQ858932	FQ858932	_PIRI_CONTIG_1747;	Finished	1
FQ858933	FQ858933	_PIRI_CONTIG_1748;	Finished	1
FQ858934	FQ858934	_PIRI_CONTIG_1749;	Finished	1
FQ858935	FQ858935	_PIRI_CONTIG_1750;	Finished	1
FQ858936	FQ858936	_PIRI_CONTIG_1751;	Finished	1
FQ858937	FQ858937	_PIRI_CONTIG_1752;	Finished	1
FQ858938	FQ858938	_PIRI_CONTIG_1753;	Finished	1
FQ858939	FQ858939	_PIRI_CONTIG_1754;	Finished	1
FQ858940	FQ858940	_PIRI_CONTIG_1755;	Finished	1
FQ858941	FQ858941	_PIRI_CONTIG_1756;	Finished	1
FQ858942	FQ858942	_PIRI_CONTIG_1757;	Finished	1
FQ858943	FQ858943	_PIRI_CONTIG_1758;	Finished	1
FQ858944	FQ858944	_PIRI_CONTIG_1759;	Finished	1
FQ858945	FQ858945	_PIRI_CONTIG_1760;	Finished	1
FQ858946	FQ858946	_PIRI_CONTIG_1761;	Finished	1
FQ858947	FQ858947	_PIRI_CONTIG_1762;	Finished	1
FQ858948	FQ858948	_PIRI_CONTIG_1763;	Finished	1
FQ858949	FQ858949	_PIRI_CONTIG_1764;	Finished	1
FQ858950	FQ858950	_PIRI_CONTIG_1765;	Finished	1
FQ858951	FQ858951	_PIRI_CONTIG_1766;	Finished	1
FQ858952	FQ858952	_PIRI_CONTIG_1767;	Finished	1
FQ858953	FQ858953	_PIRI_CONTIG_1768;	Finished	1
FQ858954	FQ858954	_PIRI_CONTIG_1769;	Finished	1
FQ858955	FQ858955	_PIRI_CONTIG_1770;	Finished	1
FQ858956	FQ858956	_PIRI_CONTIG_1771;	Finished	1
FQ858957	FQ858957	_PIRI_CONTIG_1772;	Finished	1
FQ858958	FQ858958	_PIRI_CONTIG_1773;	Finished	1
FQ858959	FQ858959	_PIRI_CONTIG_1774;	Finished	1
FQ858960	FQ858960	_PIRI_CONTIG_1775;	Finished	1
FQ858961	FQ858961	_PIRI_CONTIG_1776;	Finished	1
FQ858962	FQ858962	_PIRI_CONTIG_1777;	Finished	1
FQ858963	FQ858963	_PIRI_CONTIG_1778;	Finished	1
FQ858964	FQ858964	_PIRI_CONTIG_1779;	Finished	1
FQ858965	FQ858965	_PIRI_CONTIG_1780;	Finished	1
FQ858966	FQ858966	_PIRI_CONTIG_1781;	Finished	1
FQ858967	FQ858967	_PIRI_CONTIG_1782;	Finished	1
FQ858968	FQ858968	_PIRI_CONTIG_1783;	Finished	1
FQ858969	FQ858969	_PIRI_CONTIG_1784;	Finished	1
FQ858970	FQ858970	_PIRI_CONTIG_1785;	Finished	1
FQ858971	FQ858971	_PIRI_CONTIG_1786;	Finished	1
FQ858972	FQ858972	_PIRI_CONTIG_1787;	Finished	1
FQ858973	FQ858973	_PIRI_CONTIG_1788;	Finished	1
FQ858974	FQ858974	_PIRI_CONTIG_1789;	Finished	1
FQ858975	FQ858975	_PIRI_CONTIG_1790;	Finished	1
FQ858976	FQ858976	_PIRI_CONTIG_1791;	Finished	1
FQ858977	FQ858977	_PIRI_CONTIG_1792;	Finished	1
FQ858978	FQ858978	_PIRI_CONTIG_1793;	Finished	1
FQ858979	FQ858979	_PIRI_CONTIG_1794;	Finished	1
FQ858980	FQ858980	_PIRI_CONTIG_1795;	Finished	1
FQ858981	FQ858981	_PIRI_CONTIG_1796;	Finished	1
FQ858982	FQ858982	_PIRI_CONTIG_1797;	Finished	1
FQ858983	FQ858983	_PIRI_CONTIG_1798;	Finished	1
FQ858984	FQ858984	_PIRI_CONTIG_1799;	Finished	1
FQ858985	FQ858985	_PIRI_CONTIG_1800;	Finished	1
FQ858986	FQ858986	_PIRI_CONTIG_1801;	Finished	1
FQ858987	FQ858987	_PIRI_CONTIG_1802;	Finished	1
FQ858988	FQ858988	_PIRI_CONTIG_1803;	Finished	1
FQ858989	FQ858989	_PIRI_CONTIG_1804;	Finished	1
FQ858990	FQ858990	_PIRI_CONTIG_1805;	Finished	1
FQ858991	FQ858991	_PIRI_CONTIG_1806;	Finished	1
FQ858992	FQ858992	_PIRI_CONTIG_1807;	Finished	1
FQ858993	FQ858993	_PIRI_CONTIG_1808;	Finished	1
FQ858994	FQ858994	_PIRI_CONTIG_1809;	Finished	1
FQ858995	FQ858995	_PIRI_CONTIG_1810;	Finished	1
FQ858996	FQ858996	_PIRI_CONTIG_1811;	Finished	1
FQ858997	FQ858997	_PIRI_CONTIG_1812;	Finished	1
FQ858998	FQ858998	_PIRI_CONTIG_1813;	Finished	1
FQ858999	FQ858999	_PIRI_CONTIG_1814;	Finished	1
FQ859000	FQ859000	_PIRI_CONTIG_1815;	Finished	1
FQ859001	FQ859001	_PIRI_CONTIG_1816;	Finished	1
FQ859002	FQ859002	_PIRI_CONTIG_1817;	Finished	1
FQ859076	FQ859076	_PIRI_CONTIG_1818;	Finished	1
FQ859003	FQ859003	_PIRI_CONTIG_1819;	Finished	1
FQ859004	FQ859004	_PIRI_CONTIG_1820;	Finished	1
FQ859005	FQ859005	_PIRI_CONTIG_1821;	Finished	1
FQ859006	FQ859006	_PIRI_CONTIG_1822;	Finished	1
FQ859007	FQ859007	_PIRI_CONTIG_1823;	Finished	1
FQ859008	FQ859008	_PIRI_CONTIG_1824;	Finished	1
FQ859009	FQ859009	_PIRI_CONTIG_1825;	Finished	1
FQ859010	FQ859010	_PIRI_CONTIG_1826;	Finished	1
FQ859011	FQ859011	_PIRI_CONTIG_1827;	Finished	1
FQ859012	FQ859012	_PIRI_CONTIG_1828;	Finished	1
FQ859013	FQ859013	_PIRI_CONTIG_1829;	Finished	1
FQ859014	FQ859014	_PIRI_CONTIG_1830;	Finished	1
FQ859015	FQ859015	_PIRI_CONTIG_1831;	Finished	1
FQ859016	FQ859016	_PIRI_CONTIG_1832;	Finished	1
FQ859017	FQ859017	_PIRI_CONTIG_1833;	Finished	1
FQ859018	FQ859018	_PIRI_CONTIG_1834;	Finished	1
FQ859019	FQ859019	_PIRI_CONTIG_1835;	Finished	1
FQ859020	FQ859020	_PIRI_CONTIG_1836;	Finished	1
FQ859021	FQ859021	_PIRI_CONTIG_1837;	Finished	1
FQ859022	FQ859022	_PIRI_CONTIG_1838;	Finished	1
FQ859023	FQ859023	_PIRI_CONTIG_1839;	Finished	1
FQ859024	FQ859024	_PIRI_CONTIG_1840;	Finished	1
FQ859025	FQ859025	_PIRI_CONTIG_1841;	Finished	1
FQ859026	FQ859026	_PIRI_CONTIG_1842;	Finished	1
FQ859027	FQ859027	_PIRI_CONTIG_1843;	Finished	1
FQ859028	FQ859028	_PIRI_CONTIG_1844;	Finished	1
FQ859029	FQ859029	_PIRI_CONTIG_1845;	Finished	1
FQ859030	FQ859030	_PIRI_CONTIG_1846;	Finished	1
FQ859031	FQ859031	_PIRI_CONTIG_1847;	Finished	1
FQ859032	FQ859032	_PIRI_CONTIG_1848;	Finished	1
FQ859033	FQ859033	_PIRI_CONTIG_1849;	Finished	1
FQ859034	FQ859034	_PIRI_CONTIG_1850;	Finished	1
FQ859035	FQ859035	_PIRI_CONTIG_1851;	Finished	1
FQ859036	FQ859036	_PIRI_CONTIG_1852;	Finished	1
FQ859037	FQ859037	_PIRI_CONTIG_1853;	Finished	1
FQ859038	FQ859038	_PIRI_CONTIG_1854;	Finished	1
FQ859039	FQ859039	_PIRI_CONTIG_1855;	Finished	1
FQ859040	FQ859040	_PIRI_CONTIG_1856;	Finished	1
FQ859041	FQ859041	_PIRI_CONTIG_1857;	Finished	1
FQ859042	FQ859042	_PIRI_CONTIG_1858;	Finished	1
FQ859043	FQ859043	_PIRI_CONTIG_1859;	Finished	1
FQ859044	FQ859044	_PIRI_CONTIG_1860;	Finished	1
FQ859045	FQ859045	_PIRI_CONTIG_1861;	Finished	1
FQ859046	FQ859046	_PIRI_CONTIG_1862;	Finished	1
FQ859047	FQ859047	_PIRI_CONTIG_1863;	Finished	1
FQ859048	FQ859048	_PIRI_CONTIG_1864;	Finished	1
FQ859049	FQ859049	_PIRI_CONTIG_1865;	Finished	1
FQ859050	FQ859050	_PIRI_CONTIG_1866;	Finished	1
FQ859051	FQ859051	_PIRI_CONTIG_1867;	Finished	1
FQ859052	FQ859052	_PIRI_CONTIG_1868;	Finished	1
FQ859053	FQ859053	_PIRI_CONTIG_1869;	Finished	1
FQ859054	FQ859054	_PIRI_CONTIG_1870;	Finished	1
FQ859055	FQ859055	_PIRI_CONTIG_1871;	Finished	1
FQ859056	FQ859056	_PIRI_CONTIG_1872;	Finished	1
FQ859057	FQ859057	_PIRI_CONTIG_1873;	Finished	1
FQ859058	FQ859058	_PIRI_CONTIG_1874;	Finished	1
FQ859059	FQ859059	_PIRI_CONTIG_1875;	Finished	1
FQ859060	FQ859060	_PIRI_CONTIG_1876;	Finished	1
FQ859061	FQ859061	_PIRI_CONTIG_1877;	Finished	1
FQ859062	FQ859062	_PIRI_CONTIG_1878;	Finished	1
FQ859063	FQ859063	_PIRI_CONTIG_1879;	Finished	1
FQ859064	FQ859064	_PIRI_CONTIG_1880;	Finished	1
FQ859065	FQ859065	_PIRI_CONTIG_1881;	Finished	1
FQ859066	FQ859066	_PIRI_CONTIG_1882;	Finished	1
FQ859067	FQ859067	_PIRI_CONTIG_1883;	Finished	1
FQ859068	FQ859068	_PIRI_CONTIG_1884;	Finished	1
FQ859090	FQ859090	_PIRI_MITO	Finished	1
